1 **TITLE**

2 Lack of evidence for microbiota in the placental and fetal tissues of rhesus macaques

3

4 **SHORT TITLE**

5 Primate placental and fetal tissues lack microbiota

6

7 **AUTHORS**

8 Kevin R. Theis<sup>1,2#</sup>, Roberto Romero<sup>2-7#</sup>, Andrew D. Winters<sup>1,2</sup>, Alan H. Jobe<sup>8</sup>, Nardhy Gomez-  
9 Lopez<sup>1,2,9#</sup>

10

11 <sup>1</sup> Department of Biochemistry, Microbiology and Immunology, Wayne State University School  
12 of Medicine, Detroit, MI, USA

13 <sup>2</sup> Perinatology Research Branch, Division of Obstetrics and Maternal-Fetal Medicine, Division  
14 of Intramural Research, *Eunice Kennedy Shriver* National Institute of Child Health and Human  
15 Development, National Institutes of Health, U.S. Department of Health and Human Services.  
16 Bethesda, MD and Detroit, MI

17 <sup>3</sup> Department of Obstetrics and Gynecology, University of Michigan, Ann Arbor, MI, USA

18 <sup>4</sup> Department of Epidemiology and Biostatistics, Michigan State University, East Lansing, MI,  
19 USA

20 <sup>5</sup> Center for Molecular Medicine and Genetics, Wayne State University, Detroit, MI, USA

21 <sup>6</sup> Detroit Medical Center, Detroit, MI, USA

22 <sup>7</sup> Department of Obstetrics and Gynecology, Florida International University, Miami, FL, USA

23 <sup>8</sup> Cincinnati Children's Hospital, University of Cincinnati School of Medicine, Cincinnati, OH,  
24 USA

25 <sup>9</sup> Department of Obstetrics and Gynecology, Wayne State University School of Medicine,  
26 Detroit, MI, USA

27

## 28 **CORRESPONDING AUTHOR(S)**

29 # Kevin R. Theis ([ktheis@med.wayne.edu](mailto:ktheis@med.wayne.edu))

30 # Roberto Romero ([prbchiefstaff@med.wayne.edu](mailto:prbchiefstaff@med.wayne.edu))

31 # Nardhy Gomez-Lopez ([ngomezlo@med.wayne.edu](mailto:ngomezlo@med.wayne.edu))

32

## 33 **FUNDING**

34 This research was supported, in part, by the Perinatology Research Branch, Division of  
35 Obstetrics and Maternal-Fetal Medicine, Division of Intramural Research, *Eunice Kennedy*  
36 *Shriver* National Institute of Child Health and Human Development, National Institutes of  
37 Health, U.S. Department of Health and Human Services (NICHD/NIH/DHHS); and, in part, with  
38 Federal funds from NICHD/NIH/DHHS under Contract No. HHSN275201300006C.  
39 Management of rhesus macaque pregnancies and tissue collection were funded by NIH  
40 U01ES029234 (PI Claire Chougnet) and Bill and Melinda Gates Foundation OPP1132910 (PI  
41 Alan Jobe).

42 Dr. Romero has contributed to this work as part of his official duties as an employee of the  
43 United States Federal Government.

44

45 **WORD COUNT OF ABSTRACT: 250**

46 **WORD COUNT OF TEXT: 3631 (excluding Materials and Methods)**

47 **ABSTRACT**

48 The prevailing paradigm in obstetrics has been the sterile womb hypothesis. However, some are  
49 asserting that the placenta, intra-amniotic environment, and fetus harbor microbial communities.  
50 The objective of this study was to determine if the fetal and placental tissues of rhesus macaques  
51 harbor viable bacterial communities. Fetal, placental, and uterine wall samples were obtained  
52 from cesarean deliveries without labor (~130/166 days gestation). The presence of viable  
53 bacteria in the fetal intestine and placenta was investigated through culture. The bacterial burden  
54 and profile of the placenta, umbilical cord, and fetal brain, heart, liver, and colon were  
55 determined through quantitative real-time PCR and DNA sequencing. These data were compared  
56 with those of the uterine wall, as well as to negative and positive technical controls. Bacterial  
57 cultures of fetal and placental tissues yielded only a single colony of *Cutibacterium acnes*. This  
58 bacterium was detected at a low relative abundance (0.02%) in the 16S rRNA gene profile of the  
59 villous tree sample from which it was cultured, yet it was also identified in 12/29 background  
60 technical controls. The bacterial burden and profile of fetal and placental tissues did not exceed  
61 or differ from those of background technical controls. In contrast, the bacterial burden and  
62 profiles of positive controls exceeded and differed from those of background controls. Among  
63 the macaque samples, distinct microbial signals were limited to the uterine wall. Therefore, using  
64 multiple modes of microbiologic inquiry, there was not consistent evidence of viable bacterial  
65 communities in the fetal and placental tissues of rhesus macaques.

66

67

68 **IMPORTANCE**

69 Microbial invasion of the amniotic cavity (i.e. intra-amniotic infection) has been causally linked  
70 to pregnancy complications, especially preterm birth. Therefore, if the placenta and the fetus are  
71 typically populated by low biomass yet viable microbial communities, current understanding of  
72 the role of microbes in reproduction and pregnancy outcomes will need to be fundamentally  
73 reconsidered. Could these communities be of benefit by competitively excluding potential  
74 pathogens or priming the fetal immune system for the microbial bombardment it will experience  
75 upon delivery? If so, what properties (e.g. microbial load, community membership) of these  
76 microbial communities preclude versus promote intra-amniotic infection? Given the  
77 ramifications of the *in utero* colonization hypothesis, critical evaluation is required. In this study,  
78 using multiple modes of microbiologic inquiry (i.e. culture, qPCR, DNA sequencing) and  
79 controlling for potential background DNA contamination, we did not find consistent evidence for  
80 microbial communities in the placenta and fetal tissues of rhesus macaques.

81

82 **Key words**

83 Microbiome, low microbial biomass, pregnancy, *in utero* colonization, non-human primate  
84 model

85

86

## 87 INTRODUCTION

88 The development and widespread use of DNA sequencing technologies to characterize  
89 host-associated microbial communities has increasingly led researchers to question the sterility  
90 of body sites and fluids previously presumed to be free of resident microorganisms. For example,  
91 researchers have recently proposed the existence of microbiota in the human blood (1-8), bladder  
92 (9-16), uterus (17-30), placenta (31-45), and fetus (36, 44-46). This has led to discussion in the  
93 literature on the caveats associated with studies of the microbiota of very low microbial biomass,  
94 or potentially sterile, body sites (47-54). In particular, there has been much debate over the  
95 existence of a placental microbiota (31-45, 50, 55-69) and of *in utero* microbial colonization of  
96 the human fetus (36, 44-46, 64, 70-72).

97 The primary focus of the debate is that most of the studies proposing the existence of  
98 placental and fetal microbiota in humans have relied heavily, if not exclusively, on DNA  
99 sequencing techniques (31-35, 37-42, 45), and the bacterial signals in these studies may be  
100 background DNA contaminants from extraction kits, PCR and sequencing reagents, and general  
101 laboratory environments (50, 55, 57, 59, 62). Furthermore, even if the bacterial DNA sequence  
102 data are derived from placental and fetal tissues and not from background contamination, this  
103 does not necessarily indicate that there are viable bacterial communities in the placenta or the  
104 fetus. Specifically, the bacterial DNA sequence data may reflect bacterial products and  
105 components rather than resident microbiota (73-77).

106 As a consequence, we and others (50, 62) have suggested criteria for establishing the  
107 existence of placental and fetal microbiota. First, viability of the resident bacteria should be  
108 established through culture or metatranscriptomic data from bacterial-specific genes within  
109 placental and fetal tissues. Second, the bacterial load of placental and fetal tissues, as

110 demonstrated through quantitative real-time PCR (qPCR), should exceed those of background  
111 technical controls. Third, the bacterial profiles of placental and fetal tissues should be distinct  
112 from those of the technical controls. Fourth, the resident bacteria should be visualized in the  
113 tissues through microscopy. Fifth, the taxonomic data of the detected bacteria should be  
114 ecologically plausible (50, 62). There have been many studies that may have met one or two of  
115 these criteria (31-46, 78-80), but no study has yet attempted to simultaneously meet all criteria  
116 and ultimately conclude that there is widespread colonization of the placenta and/or fetus by  
117 viable microbial communities (72).

118         Although most of the research evaluating the existence of placental and fetal microbiota  
119 has been done with human subjects, animal models afford opportunities to surgically obtain  
120 placental and fetal tissues before the process of labor. Tissues collected after the process of labor  
121 could confound experimental results regarding *in utero* colonization due to potential microbial  
122 invasion of the amniotic cavity (81-83). Several studies using rat and mouse models have  
123 provided mixed evidence: while three studies detected placental and fetal microbiota through  
124 DNA sequencing techniques following cesarean delivery (44, 46, 75), two other studies did not  
125 (60, 84). In non-human primates, specifically rhesus and Japanese macaques, a unique placental  
126 and/or fetal microbiota has been consistently detected through DNA sequencing following  
127 cesarean delivery (85-89). However, these preliminary studies neither include culture or qPCR  
128 components nor display the sequence data from background technical controls.

129         The objective of the current study was therefore to determine whether the fetal and  
130 placental tissues of rhesus macaques harbor bacterial communities using bacterial culture, qPCR,  
131 and 16S rRNA gene sequencing and by comparing the bacterial profiles of these tissues to those  
132 of background technical controls.

133 **RESULTS**

134 *Bacterial culture from fetal and placental samples*

135 All negative culture controls were negative (no bacterial growth over seven days) and all  
136 positive culture controls were positive (lawn of bacterial growth within 24 hours). The 96 total  
137 cultures of fetal and placental samples from the four rhesus macaques yielded only a single  
138 bacterial colony (**Figure 1**). This bacterium grew on an anaerobically incubated chocolate agar  
139 plate inoculated with the villous tree sample from Subject 1. A BLAST query of the 16S rRNA  
140 gene of this bacterium revealed that it was *Cutibacterium acnes*. Specifically, the 16S rRNA  
141 genes of this bacterium and American Type Culture Collection (ATCC) strain 6919 (Accession #  
142 NR\_040847.1; *Cutibacterium acnes* Scholz and Kilian) were identical across 1,056 nucleotide  
143 bases.

144 It was next determined whether the 16S rRNA gene of this cultured bacterium was also  
145 present in the 16S rRNA gene profile of the villous tree sample from which it was recovered, as  
146 well as in the profiles of other fetal, placental, and uterine wall samples for Subject 1. The 16S  
147 rRNA gene profile of the villous tree swab sample from Subject 1 included 35,780 sequences  
148 and had a Good's coverage value of 99.9% (i.e., the sample's bacterial profile was thoroughly  
149 characterized). Seven of the 35,780 (0.02%) sequences from this sample were an exact match to  
150 the V4 region of the 16S rRNA gene of the cultured *Cutibacterium*. There was not an exact  
151 match to any of the 16S rRNA gene sequences in the bacterial profile of the villous tree and  
152 basal plate tissue (i.e. not a swab) sample for Subject 1, but this sample included only 78  
153 sequences (i.e., it was not well characterized). Exact matches to the cultured *Cutibacterium*'s  
154 16S rRNA gene were also identified in the bacterial profiles of the chorionic plate [chorionic  
155 plate tissue: 21/355 (5.9%) sequences; top of amnion swab: 1/87,899 (0.001%) sequences;

156 amnion-chorion interface swab: 14/350 (4.0%) sequences], the umbilical cord [24/13,700  
157 (0.18%) sequences], the fetal distal colon [286/106,663 (0.27%) sequences], and the fetal heart  
158 [163/11436 (1.4%) sequences] for Subject 1. Exact matches to the cultured *Cutibacterium*'s 16S  
159 rRNA gene were also identified in the bacterial profile of the decidua swab for Subject 1  
160 [22,619/76,987 (29.4%) sequences].

161 Lastly, it was determined whether the 16S rRNA gene of this cultured bacterium was  
162 present in the 16S rRNA gene profiles (prior to subsampling) of the background technical  
163 controls. Exact matches to the 16S rRNA gene of this cultured *Cutibacterium* were identified in  
164 5/14 (35.7%) sterile swab controls and 7/15 (46.7%) blank DNA extraction kit controls at  
165 average relative abundances of 0.46% (maximum 2.0%) and 4.55% (maximum 23.1%),  
166 respectively. Therefore, it is unclear if this *Cutibacterium* was present in fetal, placental, and  
167 uterine wall samples of Subject 1 or if it was a contaminant.

168

### 169 **Quantitative real-time PCR (qPCR) of fetal, placental, and uterine wall samples and** 170 **controls**

171 The bacterial burden of fetal and placental tissues did not exceed that of background  
172 technical controls (**Figure 2A,B**). Among the swab samples, only the maternal myometrium had  
173 a higher bacterial load than sterile swabs (Mann-Whitney U test:  $U = 0$ ,  $p = 0.005$ ; **Figure 2A**).  
174 No fetal, placental, or uterine wall tissue samples consistently had higher bacterial loads than  
175 blank DNA extraction kits (**Figure 2B**).

176

### 177 **16S rRNA gene sequencing of fetal, placental, and uterine wall samples and controls**



178 Twelve of the 14 (85.7%) sterile swab controls and 10/15 (66.7%) blank DNA extraction  
179 kits yielded a 16S rRNA gene library with  $\geq 500$  quality-filtered sequences and a Good's  
180 coverage  $\geq 95\%$ . Twenty-six of 28 (92.9%) fetal and placental swab samples and 22/28 (78.6%)  
181 fetal and placental tissue samples yielded 16S rRNA gene libraries meeting these criteria, as did  
182 all (10/10) uterine wall samples and all (3/3) human urine positive controls. These samples were  
183 included in 16S rRNA gene profile analyses.

184 With respect to alpha diversity, there were no swab or tissue sample types from rhesus  
185 macaques whose amplicon sequence variant (ASV) profiles had a richness (i.e. Chao1 index) or  
186 heterogeneity (i.e. Shannon and Simpson indices) that differed from those of their respective  
187 negative technical control. Human urine samples also did not have ASV profiles that differed in  
188 richness or heterogeneity from the sterile swab controls.

189 With respect to beta diversity, the overall ASV profiles of fetal and placental swab and  
190 tissue samples did not differ from those of their respective technical control (NPMANOVA  
191 using the Bray-Curtis similarity index;  $p \geq 0.21$ ; **Figure 3**). The ASV profiles of swabs of the  
192 myometrium ( $F = 1.739$ ,  $p = 0.0094$ ), but not the decidua ( $F = 0.9193$ ,  $p = 0.64$ ), differed from  
193 the profiles of sterile swabs (**Figure 3A**). Similarly, the ASV profiles of uterine wall biopsies  
194 differed from those of blank DNA extraction kits ( $F = 1.860$ ,  $p = 0.0076$ ; **Figure 3B**). The ASV  
195 profiles of human urine also differed from those of sterile swab controls ( $F = 1.834$ ,  $p = 0.0058$ ).

196 The bacterial taxonomic data associated with the ASV profiles of the fetal, placental, and  
197 uterine wall samples and controls are illustrated in **Figure 4**. There were only two prominent ( $\geq$   
198 5% relative abundance) ASVs among the fetal and placental swab and tissue samples: ASVs 001  
199 (*Staphylococcus*) and 002 (*Pelomonas*). These two ASVs were also prominent in the profiles of  
200 both the sterile swabs and the blank DNA extraction kits. ASV 001 was identified in the profiles

201 of 9/12 (75%) and 5/10 (50%) swab and extraction kit technical controls, respectively, while  
202 ASV 002 was identified in 5/12 (42%) sterile swab and 6/10 (60%) extraction kit profiles. ASV  
203 001, but not ASV 002, was identified as a contaminant among swab samples by the decontam  
204 program (**Figure 4**). Among tissue samples, neither ASV 001 or ASV 002 were identified as  
205 contaminants using decontam.

206 Aside from ASV 002, ASVs 003 (*Acinetobacter*), 007 (*Ottowia*), and 012 (uncl.  
207 Obscuribacterales) were prominent ( $\geq 5\%$  relative abundance) among both uterine wall swab and  
208 tissue samples (**Figure 4**). None of these three ASVs were prominent among either sterile swab  
209 or extraction kit technical controls, but ASV 012 (uncl. Obscuribacterales) was identified as a  
210 contaminant by the decontam program among the swab samples. ASV 003 (*Acinetobacter*) was  
211 identified in 2/3 decidua swab, 3/3 myometrium swab, and 4/4 uterine wall biopsy samples, with  
212 an average relative abundance of 22.9%. Conversely, it was identified in only 1/12 sterile swab  
213 and 0/10 blank extraction kit controls. ASV 007 (*Ottowia*) was identified in 1/3 decidua swab,  
214 2/3 myometrium swab, and 3/4 uterine wall biopsy samples, with an average relative abundance  
215 of 10.5%. This ASV was not identified in any sterile swab or blank extraction kit control.

216 Human urine samples were sequenced alongside the rhesus macaque swab samples to  
217 serve as low microbial biomass positive controls. The prominent ( $\geq 5\%$  relative abundance)  
218 ASVs among the urine samples were 004 (*Lactobacillus*), 013 (*Lactobacillus*), and 030  
219 (*Gardnerella*). These three ASVs were not identified in the profiles of any of the sterile swabs.

## 220 **DISCUSSION**

### 221 **Principal findings of the study**

222 First, recovery of bacterial cultures from the fetal and placental tissues of rhesus  
223 macaques was very rare. The 96 cultures performed yielded only a single colony of  
224 *Cutibacterium (Propionibacterium) acnes*. Second, the bacterial burden of fetal and placental  
225 samples did not exceed that of background technical controls. Third, the bacterial profiles of fetal  
226 and placental samples did not differ from those of background technical controls. Fourth, among  
227 the intrauterine sites of the rhesus macaque investigated here, only the uterine wall exhibited a  
228 distinct microbial signature.

229

### 230 **Prior reports of fetal and placental microbiota in non-human primates**

231 There have been five preliminary studies (85-89) of fetal (130-139 days gestation) and/or  
232 placental microbiota in rhesus and Japanese macaques and the collective conclusion was that the  
233 intrauterine environment, the fetus, and the placenta were colonized by bacterial communities. In  
234 the first three studies, rhesus or Japanese macaque dams received control or high fat diets. In the  
235 first study (85), the bacterial profiles of the fetal colon and oral cavity of rhesus macaques were  
236 compared to those of the placenta and the maternal anal, vaginal, and oral cavity using 16S  
237 rRNA gene sequencing. The bacterial profiles of fetal samples were similar to those of the  
238 placenta but distinct from those of maternal samples. The bacteria reportedly inhabiting the fetus  
239 (i.e. *Acinetobacter*, *Propionibacterium*, *Streptococcus*, *Staphylococcus*, and *Bacteroides*)  
240 appeared to be derived from the placental microbiota (85). In the second study (86), the bacterial  
241 profiles of the fetal colon and oral cavity of Japanese macaques were compared between dams  
242 receiving control and high-fat diets using 16S rRNA gene sequencing. The fetal bacterial profiles

243 differed between the two treatment groups and the bacterial profiles of the offspring of dams  
244 receiving a high-fat diet exhibited a higher relative abundance of Pasteurellaceae than did the  
245 profiles of offspring from control dams. In the third study (87), the bacterial profiles of the fetal  
246 colon of Japanese macaques were compared with those of the developing infant colon at six and  
247 10 months of age using 16S rRNA gene and shotgun metagenomic sequencing. Predominant  
248 members of the infant gut microbiota were often identified in the bacterial profiles of the fetal  
249 colon.

250         In the fourth and fifth studies, rhesus macaque dams received intra-amniotic injections of  
251 saline, lipopolysaccharide, interleukin 1  $\beta$ , or *Ureaplasma parvum* to serve as a primate model of  
252 inflammatory preterm birth. In the fourth study (88), the intra-amniotic injection of inflammatory  
253 inducers (i.e. lipopolysaccharide, interleukin 1  $\beta$ , or *Ureaplasma parvum*) altered the bacterial  
254 profiles of the placenta. In the fifth study (89), the intra-amniotic injection of inflammatory  
255 inducers again altered the bacterial profiles of the placenta; the bacterial profiles of placentas  
256 from control subjects exhibited a higher alpha diversity than those from subjects receiving  
257 inflammatory inducers. Relatively abundant taxa within the placental bacterial profiles of control  
258 subjects included *Acinetobacter*, *Agrobacterium*, *Bacteroides*, *Blautia*, *Cloacibacterium*,  
259 *Faecalibacterium*, *Haemophilus*, *Lactobacillus*, *Oscillospira*, *Porphyromonas*, *Prevotella*, and  
260 *Streptococcus*.

261         These five preliminary studies (85-89) provided initial investigations into the existence of  
262 fetal and/or placental microbiota in non-human primates. However, these preliminary studies did  
263 not include culture or qPCR components and, although DNA extraction and sequencing controls  
264 were mentioned in descriptions of the study design, the data from these controls were not  
265 presented or incorporated into the analyses of the bacterial profiles of fetal and placental

266 samples. Therefore, it is unknown if the reported bacterial signals were distinct from or greater  
267 than those present in background technical controls. Even if the bacterial signals from fetal and  
268 placental samples were distinct from those in controls, it is still unknown if they are derived from  
269 viable microbiota inhabiting the fetal and placental compartments of macaques.

270

### 271 **The findings of this study in the context of prior reports**

272 The current study includes culture and qPCR components and incorporates data from  
273 background technical controls into the analysis and evaluation of the existence of fetal, placental  
274 and uterine wall microbiota.

275 The collective bacterial cultures in this study yielded only a single isolate; one colony of  
276 *Cutibacterium (Propionibacterium) acnes* was obtained from a villous tree sample. The 16S  
277 rRNA gene of this bacterium was identified in the molecular surveys of this villous tree sample,  
278 as well as in the molecular surveys of the chorionic plate, umbilical cord, fetal colon and fetal  
279 heart samples from this subject. The relative abundance of this bacterium in the 16S rRNA gene  
280 profile of the villous tree sample was very low (0.02%), but its relative abundance in the swab of  
281 the maternal decidua sample from this subject was 29.4%. Given that this bacterium was cultured  
282 from the villous tree, was identified in molecular surveys of the villous tree sample and other  
283 placental and fetal samples from this subject, and was further detected at high relative  
284 abundances in a maternal decidua sample for this subject, it is reasonable to consider whether  
285 this isolate represents a viable bacterium that was transmitted from the mother to the fetus  
286 through the placenta. *Cutibacterium (Propionibacterium) acnes* has also been cultured from the  
287 human placenta and intra-amniotic environment. For instance, in a recent study concluding there  
288 exists distinct microbial communities in the human placenta and amniotic fluid in normal term

289 pregnancies (36), 17/24 (70.8%) bacterial isolates obtained from placental tissues and amniotic  
290 fluids were *Propionibacterium* spp. and 5/24 (20.8%) were specifically *Cutibacterium*  
291 (*Propionibacterium*) *acnes*. However, in the current study, the 16S rRNA gene of the cultured  
292 *Cutibacterium* (*Propionibacterium*) *acnes* was identified in the molecular surveys of 12/29  
293 (41.4%) background technical controls and in the bacterial profile of one blank DNA extraction  
294 kit this 16S rRNA gene variant constituted 23.1% of the sequences. Furthermore, *Cutibacterium*  
295 (*Propionibacterium*) *acnes* is a typical member of the human skin microbiota (90). Therefore, it  
296 is also reasonable to consider whether this isolate and molecular signals of  
297 *Cutibacterium/Propionibacterium* may simply represent microbial contamination from study  
298 personnel.

299 In the current study, qPCR revealed that the quantities of 16S rRNA gene copies in the  
300 placenta (i.e. basal plate, villous tree, and the subchorion, amnion-chorion interface, and amnion  
301 of the chorionic plate), umbilical cord, and fetal organs (i.e. brain, heart, liver, colon) of rhesus  
302 macaques did not exceed those in background technical controls (i.e. sterile swabs and DNA  
303 extraction kits). These results are consistent with those of prior studies showing that the  
304 quantities of 16S rRNA gene copies in the human placenta are indistinguishable from those of  
305 background technical controls (55, 57, 62).

306 In this study, there were no fetal or placental sites whose 16S rRNA gene profiles  
307 differed from those of background technical controls. Among the fetal and placental samples  
308 there were only two prominent (i.e.  $\geq 5\%$  average relative abundance) ASVs – they were  
309 classified as *Staphylococcus* and *Pelomonas*. *Staphylococcus* is a genus of bacteria commonly  
310 associated with mammalian skin and mucosal surfaces (91). It was detected in a preliminary  
311 molecular survey of the fetus and placenta of the Japanese macaque (85) and it has also been

312 reported in numerous DNA sequence-based investigations of the human placenta (31-38, 41-43).  
313 However, *Staphylococcus* has also been identified as a background DNA contaminant in  
314 sequence-based studies (48), including in several prior studies of the human placenta (39, 57,  
315 62). In the current study, the prominent ASV classified as *Staphylococcus* was also prominent  
316 and widespread among the background technical control samples, suggesting that it was a  
317 background DNA contaminant in this study as well.

318 *Pelomonas* is a genus of bacteria previously isolated from mud, industrial water, and  
319 hemodialysis water (92, 93). *Pelomonas* was not reported in prior preliminary molecular surveys  
320 of the fetal and placental tissues of macaques (85, 89), and it has only been reported in a single  
321 study as being a component of the human placental microbiota (41). Yet, *Pelomonas* has been  
322 identified as a background DNA contaminant in sequence-based studies (47, 48, 94), including in  
323 prior studies of the human placenta (57, 59, 62). As with *Staphylococcus*, in the current study,  
324 the prominent ASV classified as *Pelomonas* was also prominent and widespread among the  
325 background technical control samples, suggesting that it was a background DNA contaminant.

326 The only rhesus macaque samples with bacterial profiles distinct from those of  
327 background technical controls were the myometrial swabs and the uterine wall biopsies. These  
328 sample types also had the highest bacterial load, as assessed through qPCR. There were four  
329 ASVs that were prominent (i.e.  $\geq 5\%$  average relative abundance) among all uterine wall  
330 samples – they were classified as *Acinetobacter*, *Ottowia*, *Pelomonas*, and a member of the order  
331 Obscuribacterales. As discussed above, the ASV classified as *Pelomonas* is likely a DNA  
332 contaminant. Also, the program decontam identified the ASV classified as Obscuribacterales as  
333 another likely DNA contaminant. The data from *Acinetobacter* and *Ottowia* are more  
334 compelling. The primary ASV classified as *Acinetobacter* was detected in 9/10 (90%) uterine

335 wall samples at an average relative abundance of 22.9%. In contrast, it was detected in only 1/22  
336 (4.5%) background technical controls. *Acinetobacter* has been reported in prior sequence-based  
337 investigations of the human endometrium (20, 23, 24, 29, 30), and it has been cultured from the  
338 human endometrium as well (95). The primary ASV classified as *Ottowia* was detected in 6/10  
339 (60%) uterine wall samples at an average relative abundance of 10.5%. It was not detected in any  
340 background technical controls. *Ottowia* is a genus of bacteria that has been isolated from  
341 industrial and municipal wastewater (96-99), sikhye (100), tofu residue (101), and fish intestines  
342 (102); it has not been identified in investigations of the human uterus. Nevertheless, *Ottowia* is a  
343 member of the family Comamonadaceae, and Chen et al (23) and Winters et al (30) reported that  
344 Comamonadaceae was among the most relatively abundant bacterial taxa in the human  
345 endometrium. Whether the molecular signals of *Acinetobacter* and *Ottowia* in the uterine wall in  
346 the current study represent a viable and residential uterine microbiota in rhesus macaques is  
347 unknown. However, the existence of uterine microbiota in non-human primates and the potential  
348 ramifications for female reproductive health warrant further investigation.

349

### 350 **Strengths of this study**

351 First, this study included multiple modes of microbiologic inquiry, including bacterial  
352 culture, 16S rRNA gene qPCR, and 16S rRNA gene sequencing, to determine if the fetal,  
353 placental, and uterine wall tissues of rhesus macaques harbor bacterial communities. Second,  
354 placenta, fetal intestine, and uterine wall tissues were sampled both directly and through the use  
355 of swabs to enable verification of molecular microbiology results across sampling methods.  
356 Third, this study included low microbial biomass samples (i.e. human urine) to serve as technical  
357 positive controls for 16S rRNA gene qPCR and sequencing analyses. Fourth, controls for



358 potential background DNA contamination were incorporated into 16S rRNA gene qPCR and  
359 sequencing analyses.

360

### 361 **Limitations of this study**

362 First, given that the study was conducted on a non-human primate, the sample size was  
363 understandably low. Second, this study did not include fluorescent *in situ* hybridization or  
364 scanning electron microscopy to visualize potential microbial communities in the fetal, placental,  
365 and uterine wall tissues of rhesus macaques. Third, this study focused exclusively on evaluating  
366 the existence of bacterial communities in the fetal and placental tissues of rhesus macaques. The  
367 existence of eukaryotic microbial communities and viruses in these tissues was not considered.

368

### 369 **Conclusions**

370 Using bacterial culture, 16S rRNA gene qPCR, and 16S rRNA gene sequencing, there  
371 was not consistent evidence of bacterial communities inhabiting the fetal and placental tissues of  
372 rhesus macaques. This study provides further evidence against the *in utero* colonization  
373 hypothesis and the existence of a placental microbiota. If there are intrauterine bacterial  
374 communities, they are limited to the uterine wall.

375

### 376 **Acknowledgements**

377 We gratefully acknowledge Sarah Davis and Christy Johnson of the California National Primate  
378 Research Center at the University of California Davis for critical logistical support and for  
379 monitoring and reporting the results of bacterial cultures, respectively.

380

## 381 MATERIALS AND METHODS

### 382 Study subjects and sample collection

383 This was a cross-sectional study of four rhesus macaque dams undergoing cesarean  
384 delivery of a ~130-day (129-132) gestational age fetus without labor. These dams were among  
385 the saline control subjects of a broader study at the California National Primate Research Center  
386 within the University of California Davis, with approved procedures and protocols through  
387 IACUC #20330 in 2018. Upon delivery of the fetus, a uterine wall biopsy and Dacron swabs  
388 (Medical Packaging Corp., Camarillo, CA) of the uterine wall decidua and the myometrium were  
389 collected (these uterine wall swabs were not collected from subject 3). Dams did not receive  
390 antibiotics, including intraoperative prophylaxis, prior to sampling.

391 The placenta and umbilical cord were placed in an autoclave-sterilized container and  
392 covered. Rhesus macaque fetuses were euthanized with pentobarbital (100 mg/kg) prior to  
393 necropsy. The fetal liver, heart, and brain were snap frozen in sterile 50 ml conical tubes. The  
394 fetal colon was also placed in a sterile 50 ml conical tube and it, along with the placenta and  
395 umbilical cord, were immediately transported to a biological safety cabinet in a nearby  
396 laboratory within the National Primate Research Center for further processing.

397 Study personnel donned sterile surgical gowns, masks, full hoods, and powder-free exam  
398 gloves during sample processing. Sterile disposable scissors and forceps were used throughout,  
399 and new scissors and forceps were used for each organ and each specific organ site that was  
400 sampled. Dacron swabs and ESwabs (BD Diagnostics, MD) were collected for molecular  
401 microbiology and bacterial culture, respectively.

402 For the placenta, samples were collected midway between the longest distance from the  
403 cord insertion point to the edge of the placental disc. Dacron swabs were collected from three

404 sites of the chorionic plate (top of the amnion, amnion-chorion interface, and subchorion) and  
405 from the villous tree and basal plate. ESwabs were collected from two sites on the chorionic plate  
406 (amnion-chorion interface and subchorion) and from the villous tree. From a separate section of  
407 the placental disc, distant from the area where swabs were taken, a full-thickness (i.e. chorionic  
408 plate through to basal plate) portion (~1 cm<sup>2</sup>) of the placenta was collected. A cross-section of  
409 the umbilical cord was also collected. The fetal colon was sectioned into proximal, central, and  
410 distal portions. The proximal and distal portions of the colon were sliced open lengthwise and the  
411 luminal contents and mucosal lining were swabbed with Dacron swabs and ESwabs. Dacron  
412 swabs and tissues were frozen at -80°C. ESwabs were processed for culture.

413

#### 414 **Bacterial culture**

415       Within three hours of fetal delivery, ESwab samples for bacterial culture were processed  
416 in a biological safety cabinet by study personnel wearing a sterile surgical gown, mask, full  
417 hood, and powder-free exam gloves. Specifically, ESwab buffer solutions were added to SP4  
418 broth with urea (Hardy Diagnostics, Santa Maria, CA) and were plated on blood agar (trypticase  
419 soy agar with 5% sheep blood) and chocolate agar. Samples of the chorionic plate (amnion-  
420 chorion interface and the subchorion), villous tree, and fetal distal colon were inoculated on each  
421 culture medium. ESwab samples of the fetal proximal colon were inoculated on blood and  
422 chocolate agar, but not SP4 broth. Blood and chocolate agar plates were incubated under aerobic  
423 (5% CO<sub>2</sub>) and anaerobic (BD GasPak EZ anaerobic pouch; Franklin Lakes, NJ) atmospheres at  
424 37°C for seven days. SP4 broth was only incubated under aerobic conditions. Negative and  
425 positive (blood and chocolate agar inoculated with a human buccal ESwab) culture media  
426 controls were incubated alongside the rhesus macaque samples for seven days.

427

## 428 **Taxonomic identification of individual bacterial isolates**

429 Bacterial isolates (i.e. colonies) recovered from rhesus ESwab samples were  
430 taxonomically identified based upon their 16S rRNA gene sequence identity. The 16S rRNA  
431 gene of each bacterial isolate was amplified using the 27F/1492R primer set (5'-  
432 AGAGTTTGATCMTGGCTCAG-3'/5'- TACCTTGTTACGACTT-3') and then bi-directionally  
433 Sanger sequenced by GENEWIZ (South Plainfield, NJ) using the 515F/806R primer set (5'-  
434 GTGYCAGCMGCCGCGGTAA-3'/5'-GGACTACNVGGGTWTCTAAT-3'), which targets the  
435 V4 hypervariable region of the 16S rRNA gene. Forward and reverse reads were trimmed using  
436 DNA Baser software (<http://www.dnabaser.com/>) with default settings, and assembled using the  
437 CAP (contig assembly program) of BioEdit software (v7.0.5.3; Carlsbad, CA), also with default  
438 settings. The taxonomic identities of individual bacterial isolates were determined using the  
439 Basic Local Alignment Search Tool (BLAST) (103) with a percent nucleotide identity cutoff of  
440 100%.

441

## 442 **DNA extraction from swab and tissue samples**

443 All Dacron swab and tissue samples were stored at -80° C until genomic DNA  
444 extractions were performed. These extractions were performed in a biological safety cabinet by  
445 study personnel wearing sterile surgical gowns, masks, full hoods, and powder-free exam gloves.  
446 DNA was extracted from swab and tissue samples separately, and the order of extractions was  
447 randomized within each sample type (i.e. swabs and tissues).

448 For DNA extraction from Dacron swabs, a DNeasy PowerLyzer PowerSoil kit (Qiagen,  
449 Germantwon, MD) was used with minor modifications to the manufacturer's protocol.

450 Specifically, after UV sterilizing all kit reagents (excluding the spin column), 500 µl of bead  
451 solution, 200 µl of phenol:chloroform:isoamyl alcohol (pH 7–8), and a swab were added to the  
452 supplied bead tube. The tube was inverted and, after a 10-minute incubation at room  
453 temperature, the tube was vortexed and centrifuged, and the swab was removed. Sixty µl of  
454 Solution C1 were added to the tube prior to bead beating two times at 30 seconds. The remainder  
455 of the DNA extraction process was as previously published (84).

456 For DNA extraction from tissues, a Qiagen PowerSoil DNA Isolation kit was used.  
457 Minor modifications from the manufacturer’s protocol were that all kit reagents (excluding the  
458 spin column) were UV-sterilized, cells within samples were lysed by mechanical disruption three  
459 times for 30 seconds using a bead beater, and DNA was eluted from the spin column using 60 µl  
460 of C6 solution. For these extractions, 0.140 – 0.200 grams of tissue were used. For fetal heart and  
461 liver samples, longitudinal sections were taken from the middle of specimens. For umbilical cord  
462 samples, transverse sections were taken. Purified DNA was stored at -20° C.

463

#### 464 **16S rRNA gene quantitative real-time PCR (qPCR)**

##### 465 *Preliminary inhibition test*

466 A preliminary test was performed to determine whether DNA amplification inhibition  
467 existed among the different sample types (tissues and swabs by body site). Purified DNA from  
468 each sample was first quantified using a Qubit 3.0 fluorometer with a Qubit dsDNA Assay kit  
469 (Life Technologies, Carlsbad, CA). For the inhibition test, 2.0 µl of purified *Escherichia coli*  
470 ATCC 25922 (GenBank accession: CP009072) genomic DNA containing seven 16S rDNA  
471 copies per genome was spiked into 4.0 µl of purified DNA from samples (normalized to 80 ng/µl  
472 genomic DNA when possible), which had been serially diluted with Qiagen Solution C6 by a

473 factor of 1:3. Two  $\mu\text{l}$  of each spiked sample were then used as a template for qPCR. All reactions  
474 in each qPCR run were spiked with an equal amount of DNA (either  $3.28 \times 10^3$  or  $5.92 \times 10^3$  16S  
475 rRNA gene copies).

476 Total bacterial DNA abundance within spiked samples was measured via amplification of  
477 the V1 - V2 region of the 16S rRNA gene according to the protocol of Dickson et al (104), with  
478 previously published minor modifications (84). Raw amplification data were normalized to the  
479 ROX passive reference dye and analyzed using the Thermo Fisher Cloud and Standard Curve  
480 (SR) 3.3.0-SR2-build15 with automatic threshold and baseline settings. Cycle of quantification  
481 (Cq) values were calculated for samples based on the mean number of cycles required for  
482 normalized fluorescence to exponentially increase.

483 The inhibition test indicated a low level of inhibition for most rhesus macaque tissue and  
484 swab DNA sample types. Therefore, all tissue, swab, blank technical control, and positive  
485 control DNA template samples were diluted with Qiagen Solution C6 by a factor of 1:4.5 prior to  
486 qPCR. The positive controls were six human urine samples: three urine samples (genomic DNA  
487 from 10 ml urine) were run alongside the rhesus tissue samples, and three different urine samples  
488 (genomic DNA from 1 ml urine) were run alongside the rhesus swab samples. The collection of  
489 urine samples and their use for research was approved by the Human Investigation Committee of  
490 Wayne State University and the Institutional Review Board of the Eunice Kennedy Shriver  
491 National Institute of Child Health and Human Development. All subjects provided written  
492 informed consent for participation.

493

494 *qPCR data generation*

495 Total bacterial DNA abundance within rhesus macaque samples was measured by qPCR  
496 as described above for the inhibition test, with each sample being tested individually across  
497 triplicate runs. To estimate qPCR efficiency based on the slope of a standard curve and to  
498 determine the concentration of 16S rRNA gene copies in samples, a standard curve containing  
499 seven 10-fold serial dilutions (three replicates each) ranging from either  $9.52 \times 10^6$  to  $10.0 \times 10^6$   
500 rRNA gene copies (tissue samples) or  $9.97 \times 10^6$  to  $10.0 \times 10^6$  16S rRNA gene copies (swab samples)  
501 was included in each run. All individual qPCR reactions had an efficiency  $\geq 92.04\%$  (slope  $\leq -$   
502  $3.5287$ ).

503

#### 504 **16S rRNA gene sequencing of swab and tissue sample extracts**

505 Amplification and sequencing of the V4 region of the 16S rRNA gene was performed at  
506 the University of Michigan's Center for Microbial Systems as previously described (30, 84),  
507 except that library builds were performed in duplicate using 40 cycles of PCR and pooled for  
508 each individual sample prior to the equimolar pooling of all sample libraries for multiplex  
509 sequencing. Three human urine (1 ml) samples were included as positive controls. Sample-  
510 specific MiSeq run files have been deposited on the NCBI Sequence Read Archive (BioProject  
511 ID PRJNA610218).

512 Raw sequence reads were processed using DADA2 (v 1.12) (105). An analysis of 16S  
513 rRNA gene amplicon sequence variants (ASVs), defined by 100% sequence similarity, was  
514 performed using DADA2 in R (v 3.5.1) (<https://www.R-project.org>), and the online MiSeq  
515 protocol (<https://benjjneb.github.io/dada2/tutorial.html>) with minor modifications. These  
516 modifications included allowing truncation lengths of 250 bp and 150 bp and a maximum  
517 number of expected errors of 2 bp and 7 bp for forward and reverse reads, respectively. To allow

518 for increased power to detect rare variants, sample inference allowed for pooling of samples.  
519 Additionally, samples in the resulting sequence table were pooled prior to removal of chimeric  
520 sequences. Sequences were then classified using the “silva\_nr\_v132\_train\_set” database with a  
521 minimum bootstrap value of 80%, and sequences that were derived from Archaea, Chloroplast,  
522 or Eukaryota were removed.

523

## 524 **Statistical analysis**

525 Sample bacterial loads were assessed through cycle of quantification values obtained  
526 from qPCR. Differences in bacterial loads between fetal, placental, and uterine wall samples and  
527 background technical controls (i.e. sterile Dacron swabs and blank DNA extraction kits) were  
528 evaluated using Mann-Whitney U tests with sequential Bonferroni corrections applied.

529 Analyses of the 16S rRNA gene profiles of samples were limited to those with a  
530 minimum of 500 quality-filtered 16S rRNA gene sequences and a Good’s coverage  $\geq 95.0\%$   
531 after uniform subsampling of all samples to 500 sequences. The average Good’s coverage values  
532 of swab and tissue samples after subsampling were  $98.9 \pm 0.8$  SD and  $99.1 \pm 0.5$  SD,  
533 respectively. Heat maps of the 16S rRNA gene profiles of samples were generated using  
534 heatmap.2 in the gplots library for R (version 3.5.1). The R package decontam (106) was utilized  
535 to identify ASVs that were potential background DNA contaminants using the  
536 “IsNotContaminant” method with a prevalence threshold of  $P = 0.5$ . The decontam analyses  
537 were run separately for the swab and tissue samples.

538 The alpha diversity of sample ASV profiles was characterized using the Chao1 index to  
539 address profile richness and the Shannon and Simpson ( $1 - D$ ) indices to address profile  
540 heterogeneity. Differences in alpha diversity between rhesus macaque and background technical



541 control samples were evaluated using Mann-Whitney U and t-tests with sequential Bonferroni  
542 corrections applied.

543           The beta diversity of ASV profiles among fetal, placental and uterine wall samples and  
544 background technical controls was characterized using the Bray-Curtis similarity index. Bray-  
545 Curtis similarities in sample ASV profiles were visualized using Principal Coordinates Analysis  
546 (PCoA) plots and statistically evaluated using non-parametric multivariate ANOVA  
547 (NPMANOVA). PCoA plots were generated using the vegan package (version 2.5.5) in R. All  
548 statistical analyses were completed using PAST software (v 3.25) (107).

549 **REFERENCES**

- 550 1. Amar J, Serino M, Lange C, Chabo C, Iacovoni J, Mondot S, Lepage P, Klopp C, Mariette J,  
551 Bouchez O, Perez L, Courtney M, Marre M, Klopp P, Lantieri O, Doré J, Charles MA, Balkau B,  
552 Burcelin R, for the DESIRSG. 2011. Involvement of tissue bacteria in the onset of diabetes in  
553 humans: evidence for a concept. *Diabetologia* 54:3055-3061.
- 554 2. Dinakaran V, Rathinavel A, Pushpanathan M, Sivakumar R, Gunasekaran P, Rajendhran J. 2014.  
555 Elevated Levels of Circulating DNA in Cardiovascular Disease Patients: Metagenomic Profiling of  
556 Microbiome in the Circulation. *PLoS ONE* 9:e105221.
- 557 3. Païssé S, Valle C, Servant F, Courtney M, Burcelin R, Amar J, Lelouvier B. 2016. Comprehensive  
558 description of blood microbiome from healthy donors assessed by 16S targeted metagenomic  
559 sequencing. *Transfusion* 56:1138-1147.
- 560 4. Li Q, Wang C, Tang C, Zhao X, He Q, Li J. 2018. Identification and Characterization of Blood and  
561 Neutrophil-Associated Microbiomes in Patients with Severe Acute Pancreatitis Using Next-  
562 Generation Sequencing. *Front Cell Infect Microbiol* 8:5.
- 563 5. Panaiotov S, Filevski G, Equestre M, Nikolova E, Kalfin R. 2018. Cultural isolation and  
564 characteristics of the blood microbiome of healthy individuals. *AiM* 8:406-421.
- 565 6. Qiu J, Zhou H, Jing Y, Dong C. 2019. Association between blood microbiome and type 2 diabetes  
566 mellitus: A nested case-control study. *J Clin Lab Anal* 33:e22842.
- 567 7. Whittle E, Leonard MO, Harrison R, Gant TW, Tonge DP. 2019. Multi-Method Characterization of  
568 the Human Circulating Microbiome. *Front Microbiol* 9:3266.
- 569 8. You Y-A, Yoo JY, Kwon EJ, Kim YJ. 2019. Blood Microbial Communities During Pregnancy Are  
570 Associated With Preterm Birth. *Front Microbiol* 10:1122.
- 571 9. Wolfe AJ, Toh E, Shibata N, Rong R, Kenton K, Fitzgerald M, Mueller ER, Schreckenberger P, Dong  
572 Q, Nelson DE, Brubaker L. 2012. Evidence of uncultivated bacteria in the adult female bladder. *J*  
573 *Clin Microbiol* 50:1376-1383.
- 574 10. Pearce MM, Hilt EE, Rosenfeld AB, Zilliox MJ, Thomas-White K, Fok C, Kliethermes S,  
575 Schreckenberger PC, Brubaker L, Gai X, Wolfe AJ. 2014. The female urinary microbiome: a  
576 comparison of women with and without urgency urinary incontinence. *mBio* 5:e01283.
- 577 11. Jacobs KM, Thomas-White KJ, Hilt EE, Wolfe AJ, Waters TP. 2017. Microorganisms Identified in  
578 the Maternal Bladder: Discovery of the Maternal Bladder Microbiota. *AJP Reports* 7:e188-e196.
- 579 12. Thomas-White K, Forster SC, Kumar N, Van Kuiken M, Putonti C, Stares MD, Hilt EE, Price TK,  
580 Wolfe AJ, Lawley TD. 2018. Culturing of female bladder bacteria reveals an interconnected  
581 urogenital microbiota. *Nat Commun* 9:1557.
- 582 13. Komesu YM, Richter HE, Carper B, Dinwiddie DL, Lukacz ES, Siddiqui NY, Sung VW, Zyczynski HM,  
583 Ridgeway B, Rogers RG, Arya LA, Mazloomdoost D, Gantz MG, Pelvic Floor Disorders N. 2018.  
584 The urinary microbiome in women with mixed urinary incontinence compared to similarly aged  
585 controls. *Int Urogynecol J* 29:1785-1795.
- 586 14. Liu F, Lv L, Jiang H, Yan R, Dong S, Chen L, Wang W, Chen YQ. 2018. Alterations in the Urinary  
587 Microbiota Are Associated With Cesarean Delivery. *Front Microbiol* 9:2193-2193.
- 588 15. Chen J, Zhao J, Cao Y, Zhang G, Chen Y, Zhong J, Huang W, Zeng J, Wu P. 2019. Relationship  
589 between alterations of urinary microbiota and cultured negative lower urinary tract symptoms  
590 in female type 2 diabetes patients. *BMC Urol* 19:78.
- 591 16. Komesu YM, Dinwiddie DL, Richter HE, Lukacz ES, Sung VW, Siddiqui NY, Zyczynski HM,  
592 Ridgeway B, Rogers RG, Arya LA, Mazloomdoost D, Levy J, Carper B, Gantz MG, Eunice Kennedy  
593 Shriver National Institute of Child H, Human Development Pelvic Floor Disorders N. 2020.

- 594 Defining the relationship between vaginal and urinary microbiomes. *Am J Obstet Gynecol*  
595 222:154.e1-154.e10.
- 596 17. Fang R-L, Chen L-X, Shu W-S, Yao S-Z, Wang S-W, Chen Y-Q. 2016. Barcoded sequencing reveals  
597 diverse intrauterine microbiomes in patients suffering with endometrial polyps. *Am J Transl Res*  
598 8:1581-1592.
- 599 18. Franasiak JM, Werner MD, Juneau CR, Tao X, Landis J, Zhan Y, Treff NR, Scott RT. 2016.  
600 Endometrial microbiome at the time of embryo transfer: next-generation sequencing of the 16S  
601 ribosomal subunit. *J Assist Reprod Genet* 33:129-136.
- 602 19. Khan KN, Fujishita A, Masumoto H, Muto H, Kitajima M, Masuzaki H, Kitawaki J. 2016. Molecular  
603 detection of intrauterine microbial colonization in women with endometriosis. *Eur J Obstet*  
604 *Gynecol Reprod Biol* 199:69-75.
- 605 20. Moreno I, Codoñer FM, Vilella F, Valbuena D, Martinez-Blanch JF, Jimenez-Almazán J, Alonso R,  
606 Alamá P, Remohí J, Pellicer A, Ramon D, Simon C. 2016. Evidence that the endometrial  
607 microbiota has an effect on implantation success or failure. *Am J Obstet Gynecol* 215:684-703.
- 608 21. Verstraelen H, Vilchez-Vargas R, Desimpel F, Jauregui R, Vankeirsbilck N, Weyers S, Verhelst R,  
609 De Sutter P, Pieper DH, Van De Wiele T. 2016. Characterisation of the human uterine  
610 microbiome in non-pregnant women through deep sequencing of the V1-2 region of the 16S  
611 rRNA gene. *PeerJ* 4:e1602.
- 612 22. Walther-António MRS, Chen J, Multinu F, Hokenstad A, Distad TJ, Cheek EH, Keeney GL, Creedon  
613 DJ, Nelson H, Mariani A, Chia N. 2016. Potential contribution of the uterine microbiome in the  
614 development of endometrial cancer. *Genome Med* 8:122.
- 615 23. Chen C, Song X, Wei W, Zhong H, Dai J, Lan Z, Li F, Yu X, Feng Q, Wang Z, Xie H, Chen X, Zeng C,  
616 Wen B, Zeng L, Du H, Tang H, Xu C, Xia Y, Xia H, Yang H, Wang J, Wang J, Madsen L, Brix S,  
617 Kristiansen K, Xu X, Li J, Wu R, Jia H. 2017. The microbiota continuum along the female  
618 reproductive tract and its relation to uterine-related diseases. *Nat Commun* 8:875.
- 619 24. Miles SM, Hardy BL, Merrell DS. 2017. Investigation of the microbiota of the reproductive tract  
620 in women undergoing a total hysterectomy and bilateral salpingo-oophorectomy. *Fertil Steril*  
621 107:813-820.e1.
- 622 25. Tao X, Franasiak JM, Zhan Y, Scott RT, Rajchel J, Bedard J, Newby R, Scott RT, Treff NR, Chu T.  
623 2017. Characterizing the endometrial microbiome by analyzing the ultra-low bacteria from  
624 embryo transfer catheter tips in IVF cycles: Next generation sequencing (NGS) analysis of the  
625 16S ribosomal gene. *Human Microbiome Journal* 3:15-21.
- 626 26. Kyono K, Hashimoto T, Nagai Y, Sakuraba Y. 2018. Analysis of endometrial microbiota by 16S  
627 ribosomal RNA gene sequencing among infertile patients: a single-center pilot study.  
628 *Reproductive Medicine and Biology* 17:297-306.
- 629 27. Liu Y, Wong KK-W, Ko EY-L, Chen X, Huang J, Tsui SK-W, Li TC, Chim SS-C. 2018. Systematic  
630 Comparison of Bacterial Colonization of Endometrial Tissue and Fluid Samples in Recurrent  
631 Miscarriage Patients: Implications for Future Endometrial Microbiome Studies. *Clin Chem*  
632 64:1743-1752.
- 633 28. Wee BA, Thomas M, Sweeney EL, Frentiu FD, Samios M, Ravel J, Gajer P, Myers G, Timms P,  
634 Allan JA, Huston WM. 2018. A retrospective pilot study to determine whether the reproductive  
635 tract microbiota differs between women with a history of infertility and fertile women. *Aust N Z*  
636 *J Obstet Gynaecol* 58:341-348.
- 637 29. Leoni C, Ceci O, Manzari C, Fosso B, Volpicella M, Ferrari A, Fiorella P, Pesole G, Cicinelli E, Ceci  
638 LR. 2019. Human Endometrial Microbiota at Term of Normal Pregnancies. *Genes* 10:971.
- 639 30. Winters AD, Romero R, Gervasi MT, Gomez-Lopez N, Tran MR, Garcia-Flores V, Pacora P, Jung E,  
640 Hassan SS, Hsu CD, Theis KR. 2019. Does the endometrial cavity have a molecular microbial  
641 signature? *Sci Rep* 9:9905.

- 642 31. Aagaard K, Ma J, Antony KM, Ganu R, Petrosino J, Versalovic J. 2014. The placenta harbors a  
643 unique microbiome. *Sci Transl Med* 6:237ra65.
- 644 32. Doyle RM, Alber DG, Jones HE, Harris K, Fitzgerald F, Peebles D, Klein N. 2014. Term and preterm  
645 labour are associated with distinct microbial community structures in placental membranes  
646 which are independent of mode of delivery. *Placenta* 35:1099-101.
- 647 33. Antony KM, Ma J, Mitchell KB, Racusin DA, Versalovic J, Aagaard K. 2015. The preterm placental  
648 microbiome varies in association with excess maternal gestational weight gain. *Am J Obstet  
649 Gynecol* 212:653.e1-16.
- 650 34. Zheng J, Xiao X, Zhang Q, Mao L, Yu M, Xu J. 2015. The Placental Microbiome Varies in  
651 Association with Low Birth Weight in Full-Term Neonates. *Nutrients* 7:6924-37.
- 652 35. Bassols J, Serino M, Carreras-Badosa G, Burcelin R, Blasco-Baque V, Lopez-Bermejo A,  
653 Fernandez-Real JM. 2016. Gestational diabetes is associated with changes in placental  
654 microbiota and microbiome. *Pediatr Res* 80:777-784.
- 655 36. Collado MC, Rautava S, Aakko J, Isolauri E, Salminen S. 2016. Human gut colonisation may be  
656 initiated in utero by distinct microbial communities in the placenta and amniotic fluid. *Sci Rep*  
657 6:23129.
- 658 37. Prince AL, Ma J, Kannan PS, Alvarez M, Gisslen T, Harris RA, Sweeney EL, Knox CL, Lambers DS,  
659 Jobe AH, Chougnet CA, Kallapur SG, Aagaard KM. 2016. The placental membrane microbiome is  
660 altered among subjects with spontaneous preterm birth with and without chorioamnionitis. *Am  
661 J Obstet Gynecol* 214:627.e1-627.e16.
- 662 38. Doyle RM, Harris K, Kamiza S, Harjunmaa U, Ashorn U, Nkhoma M, Dewey KG, Maleta K, Ashorn  
663 P, Klein N. 2017. Bacterial communities found in placental tissues are associated with severe  
664 chorioamnionitis and adverse birth outcomes. *PLoS One* 12:e0180167.
- 665 39. Gomez-Arango LF, Barrett HL, McIntyre HD, Callaway LK, Morrison M, Nitert MD. 2017.  
666 Contributions of the maternal oral and gut microbiome to placental microbial colonization in  
667 overweight and obese pregnant women. *Sci Rep* 7:2860.
- 668 40. Parnell LA, Briggs CM, Cao B, Delannoy-Bruno O, Schrieffer AE, Mysorekar IU. 2017. Microbial  
669 communities in placentas from term normal pregnancy exhibit spatially variable profiles. *Sci Rep*  
670 7:11200.
- 671 41. Zheng J, Xiao XH, Zhang Q, Mao LL, Yu M, Xu JP, Wang T. 2017. Correlation of placental  
672 microbiota with fetal macrosomia and clinical characteristics in mothers and newborns.  
673 *Oncotarget* 8:82314-82325.
- 674 42. Leon LJ, Doyle R, Diez-Benavente E, Clark TG, Klein N, Stanier P, Moore GE. 2018. Enrichment of  
675 Clinically Relevant Organisms in Spontaneous Preterm-Delivered Placentas and Reagent  
676 Contamination across All Clinical Groups in a Large Pregnancy Cohort in the United Kingdom.  
677 *Appl Environ Microbiol* 84:e00483-18.
- 678 43. Seferovic MD, Pace RM, Carroll M, Belfort B, Major AM, Chu DM, Racusin DA, Castro ECC,  
679 Muldrew KL, Versalovic J, Aagaard KM. 2019. Visualization of microbes by 16S in situ  
680 hybridization in term and preterm placentas without intraamniotic infection. *Am J Obstet  
681 Gynecol* 221:146.e1-146.e23.
- 682 44. Younge N, McCann JR, Ballard J, Plunkett C, Akhtar S, Araujo-Perez F, Murtha A, Brandon D, Seed  
683 PC. 2019. Fetal exposure to the maternal microbiota in humans and mice. *JCI Insight* 4:127806.
- 684 45. Al Alam D, Danopoulos S, Grubbs B, Ali NAtBM, MacAogain M, Chotirmall SH, Warburton D,  
685 Gaggar A, Ambalavanan N, Lal CV. 2020. Human Fetal Lungs Harbor a Microbiome Signature. *Am  
686 J Respir Crit Care Med* doi:10.1164/rccm.201911-2127LE:10.1164/rccm.201911-2127LE [Epub  
687 ahead of print].
- 688 46. Borghi E, Massa V, Severgnini M, Fazio G, Avagliano L, Menegola E, Bulfamante GP, Morace G,  
689 Borgo F. 2019. Antenatal Microbial Colonization of Mammalian Gut. *Reprod Sci* 26:1045-1053.

- 690 47. Salter SJ, Cox MJ, Turek EM, Calus ST, Cookson WO, Moffatt MF, Turner P, Parkhill J, Loman NJ,  
691 Walker AW. 2014. Reagent and laboratory contamination can critically impact sequence-based  
692 microbiome analyses. *BMC Biol* 12:87.
- 693 48. Glassing A, Dowd SE, Galandiuk S, Davis B, Chiodini RJ. 2016. Inherent bacterial DNA  
694 contamination of extraction and sequencing reagents may affect interpretation of microbiota in  
695 low bacterial biomass samples. *Gut Pathog* 8:24.
- 696 49. Kim D, Hofstaedter CE, Zhao C, Mattei L, Tanes C, Clarke E, Lauder A, Sherrill-Mix S, Chehoud C,  
697 Kelsen J, Conrad M, Collman RG, Baldassano R, Bushman FD, Bittinger K. 2017. Optimizing  
698 methods and dodging pitfalls in microbiome research. *Microbiome* 5:52.
- 699 50. de Goffau MC, Lager S, Salter SJ, Wagner J, Kronbichler A, Charnock-Jones DS, Peacock SJ, Smith  
700 GCS, Parkhill J. 2018. Recognizing the reagent microbiome. *Nat Microbiol* 3:851-853.
- 701 51. Caruso V, Song X, Asquith M, Karstens L. 2019. Performance of Microbiome Sequence Inference  
702 Methods in Environments with Varying Biomass. *mSystems* 4:e00163-18.
- 703 52. Eisenhofer R, Minich JJ, Marotz C, Cooper A, Knight R, Weyrich LS. 2019. Contamination in Low  
704 Microbial Biomass Microbiome Studies: Issues and Recommendations. *Trends Microbiol* 27:105-  
705 117.
- 706 53. Karstens L, Asquith M, Davin S, Fair D, Gregory WT, Wolfe AJ, Braun J, McWeeney S. 2019.  
707 Controlling for Contaminants in Low-Biomass 16S rRNA Gene Sequencing Experiments.  
708 *mSystems* 4:e00290-19.
- 709 54. Stinson LF, Keelan JA, Payne MS. 2019. Identification and removal of contaminating microbial  
710 DNA from PCR reagents: impact on low-biomass microbiome analyses. *Lett Appl Microbiol* 68:2-  
711 8.
- 712 55. Lauder AP, Roche AM, Sherrill-Mix S, Bailey A, Laughlin AL, Bittinger K, Leite R, Elovitz MA, Parry  
713 S, Bushman FD. 2016. Comparison of placenta samples with contamination controls does not  
714 provide evidence for a distinct placenta microbiota. *Microbiome* 4:29.
- 715 56. Lager S, de Goffau MC, Sovio U, Peacock SJ, Parkhill J, Charnock-Jones DS, Smith GCS. 2018.  
716 Detecting eukaryotic microbiota with single-cell sensitivity in human tissue. *Microbiome* 6:151.
- 717 57. Leiby JS, McCormick K, Sherrill-Mix S, Clarke EL, Kessler LR, Taylor LJ, Hofstaedter CE, Roche AM,  
718 Mattei LM, Bittinger K, Elovitz MA, Leite R, Parry S, Bushman FD. 2018. Lack of detection of a  
719 human placenta microbiome in samples from preterm and term deliveries. *Microbiome* 6:196.
- 720 58. Seferovic MD, Pace RM, Meyer KM, Beninati M, Chu DM, Liu X, Li F, Aagaard K. 2018. 113:  
721 Taxonomic changes of placental microbes with bacterial-metabolized ursodeoxycholic acid  
722 treatment in IHCP is indicative of a functional placental microbiome. *Am J Obstet Gynecol*  
723 218:S81.
- 724 59. de Goffau MC, Lager S, Sovio U, Gaccioli F, Cook E, Peacock SJ, Parkhill J, Charnock-Jones DS,  
725 Smith GCS. 2019. Human placenta has no microbiome but can contain potential pathogens.  
726 *Nature* 572:329-334.
- 727 60. Kuperman AA, Zimmerman A, Hamadia S, Ziv O, Gurevich V, Fichtman B, Gavert N, Straussman  
728 R, Rechnitzer H, Barzilay M, Shvalb S, Bornstein J, Ben-Shachar I, Yagel S, Haviv I, Koren O. 2019.  
729 Deep microbial analysis of multiple placentas shows no evidence for a placental microbiome.  
730 *BJOG* 127:159-169.
- 731 61. Meyer KM, Pace RM, Prince AL, Seferovic M, Chu DM, Aagaard KM. 2019. 940: Comparison of  
732 placenta with DNA extraction controls provides evidence for distinct microbiota in placenta  
733 samples. *Am J Obstet Gynecol* 220:S606-S607.
- 734 62. Theis KR, Romero R, Winters AD, Greenberg JM, Gomez-Lopez N, Alhousseini A, Bieda J,  
735 Maymon E, Pacora P, Fettweis JM, Buck GA, Jefferson KK, Strauss JF, 3rd, Erez O, Hassan SS.  
736 2019. Does the human placenta delivered at term have a microbiota? Results of cultivation,

- 737 quantitative real-time PCR, 16S rRNA gene sequencing, and metagenomics. *Am J Obstet Gynecol*  
738 220:267.e1-267.e39.
- 739 63. Pelzer E, Gomez-Arango LF, Barrett HL, Nitert MD. 2017. Review: Maternal health and the  
740 placental microbiome. *Placenta* 54:30-37.
- 741 64. Perez-Munoz ME, Arrieta MC, Ramer-Tait AE, Walter J. 2017. A critical assessment of the "sterile  
742 womb" and "in utero colonization" hypotheses: implications for research on the pioneer infant  
743 microbiome. *Microbiome* 5:48.
- 744 65. Bushman FD. 2019. De-Discovery of the Placenta Microbiome. *Am J Obstet Gynecol* 220:213-  
745 214.
- 746 66. Fischer LA, Demerath E, Bittner-Eddy P, Costalonga M. 2019. Placental colonization with  
747 periodontal pathogens: the potential missing link. *Am J Obstet Gynecol* 221:383-392.e3.
- 748 67. O'Callaghan JL, Turner R, Dekker Nitert M, Barrett HL, Clifton V, Pelzer ES. 2019. Re-assessing  
749 microbiomes in the low-biomass reproductive niche. *BJOG* 127:147-158.
- 750 68. Peric A, Weiss J, Vulliamoz N, Baud D, Stojanov M. 2019. Bacterial Colonization of the Female  
751 Upper Genital Tract. *Int J Mol Sci* 20:e3405.
- 752 69. Stinson LF, Boyce MC, Payne MS, Keelan JA. 2019. The Not-so-Sterile Womb: Evidence That the  
753 Human Fetus Is Exposed to Bacteria Prior to Birth. *Front Microbiol* 10:1124.
- 754 70. Chu D, Stewart C, Seferovic M, Suter M, Cox J, Vidaeff A, Aagaard K. 2017. 26: Profiling of  
755 microbiota in second trimester amniotic fluid reveals a distinctive community present in the mid  
756 trimester and predictive of the placental microbiome at parturition. *Am J Obstet Gynecol*  
757 216:S18-S19.
- 758 71. Rehbinder EM, Lødrup Carlsen KC, Staff AC, Angell IL, Landrø L, Hilde K, Gaustad P, Rudi K. 2018.  
759 Is amniotic fluid of women with uncomplicated term pregnancies free of bacteria? *Am J Obstet*  
760 *Gynecol* 219:289.e1-289.e12.
- 761 72. Rackaityte E, Halkias J, Fukui EM, Mendoza VF, Hayzelden C, Crawford ED, Fujimura KE, Burt TD,  
762 Lynch SV. 2020. Viable bacterial colonization is highly limited in the human intestine in utero.  
763 *Nat Med* doi:10.1038/s41591-020-0761-3 [Epub ahead of print].
- 764 73. Satokari R, Gronroos T, Laitinen K, Salminen S, Isolauri E. 2009. Bifidobacterium and  
765 Lactobacillus DNA in the human placenta. *Lett Appl Microbiol* 48:8-12.
- 766 74. Rautava S, Collado MC, Salminen S, Isolauri E. 2012. Probiotics modulate host-microbe  
767 interaction in the placenta and fetal gut: a randomized, double-blind, placebo-controlled trial.  
768 *Neonatology* 102:178-84.
- 769 75. Martinez KA, 2nd, Romano-Keeler J, Zackular JP, Moore DJ, Brucker RM, Hooper C, Meng S,  
770 Brown N, Mallal S, Reese J, Aronoff DM, Shin H, Dominguez-Bello MG, Weitkamp JH. 2018.  
771 Bacterial DNA is present in the fetal intestine and overlaps with that in the placenta in mice.  
772 *PLoS One* 13:e0197439.
- 773 76. Kliman HJ. 2014. Comment on "the placenta harbors a unique microbiome". *Sci Transl Med*  
774 6:254le4.
- 775 77. Gomez de Agüero M, Ganai-Vonarburg SC, Fuhrer T, Rupp S, Uchimura Y, Li H, Steinert A,  
776 Heikenwalder M, Hapfelmeier S, Sauer U, McCoy KD, Macpherson AJ. 2016. The maternal  
777 microbiota drives early postnatal innate immune development. *Science* 351:1296-302.
- 778 78. Steel JH, Malatos S, Kennea N, Edwards AD, Miles L, Duggan P, Reynolds PR, Feldman RG,  
779 Sullivan MHF. 2005. Bacteria and inflammatory cells in fetal membranes do not always cause  
780 preterm labor. *Pediatric research* 57:404-411.
- 781 79. Stout MJ, Conlon B, Landeau M, Lee I, Bower C, Zhao Q, Roehl KA, Nelson DM, Macones GA,  
782 Mysorekar IU. 2013. Identification of intracellular bacteria in the basal plate of the human  
783 placenta in term and preterm gestations. *Am J Obstet Gynecol* 208:226.e1-226.e2267.

- 784 80. Cao B, Mysorekar IU. 2014. Intracellular bacteria in placental basal plate localize to extravillous  
785 trophoblasts. *Placenta* 35:139-142.
- 786 81. Egli GE, Newton M. 1961. The transport of carbon particles in the human female reproductive  
787 tract. *Fertil Steril* 12:151-155.
- 788 82. Romero R, Nores J, Mazor M, Sepulveda W, Oyarzun E, Parra M, Insunza A, Montiel F, Behnke E,  
789 Cassell GH. 1993. Microbial invasion of the amniotic cavity during term labor. Prevalence and  
790 clinical significance. *J Reprod Med* 38:543-548.
- 791 83. Seong HS, Lee SE, Kang JH, Romero R, Yoon BH. 2008. The frequency of microbial invasion of the  
792 amniotic cavity and histologic chorioamnionitis in women at term with intact membranes in the  
793 presence or absence of labor. *Am J Obstet Gynecol* 199:375.e1-375.e3755.
- 794 84. Theis KR, Romero R, Greenberg JM, Winters AD, Garcia-Flores V, Motomura K, Ahmad MM,  
795 Galaz J, Arenas-Hernandez M, Gomez-Lopez N. 2019. No consistent evidence for microbiota in  
796 murine placental and fetal tissues. *mSphere* 5:e00933-19.
- 797 85. Chu D, Prince A, Ma J, Baquero K, Blundell P, Takahashi D, Dean T, Grove K, Aagaard K. 2017.  
798 114: Evidence of fetal microbiota and its maternal origins in a non-human primate model. *Am J*  
799 *Obstet Gynecol* 216:S80.
- 800 86. Prince A, Chu D, Meyer K, Ma J, Baquero K, Blundell P, Dean T, Takahashi D, Friedman J, Grove K,  
801 Aagaard K. 2017. 23: The fetal microbiome is altered in association with maternal diet during  
802 gestation. *Am J Obstet Gynecol* 216:S17.
- 803 87. Chu D, Prince A, Ma J, Pace R, Takahashi D, Friedman J, Kievit P, Sullivan E, Grove K, Aagaard K.  
804 2018. 115: Contribution of the fetal microbiome to the taxonomic diversity and functionality of  
805 the postnatal gut microbiome in a non-human primate (NHP) model. *Am J Obstet Gynecol*  
806 218:S82-S83.
- 807 88. Prince A, Ma J, Hu M, Chu D, Miller L, Jobe A, Chougnet C, Kallapur S, Aagaard K. 2018. 843:  
808 Chorioamnionitis induced by intra-amniotic injection of IL-1, LPS, or ureaplasma parvum is  
809 associated with an altered microbiome in a primate model of inflammatory preterm birth. *Am J*  
810 *Obstet Gynecol* 218:S503.
- 811 89. Prince AL, Ma J, Hu M, Chu DM, Miller L, Jobe A, Chougnet C, Kallapur S, Aagaard KM. 2019. 521:  
812 Intra-amniotic injection alters the intrauterine microbiome in a primate model of inflammatory  
813 preterm birth. *Am J Obstet Gynecol* 220:S349.
- 814 90. Omer H, McDowell A, Alexeyev OA. 2017. Understanding the role of *Propionibacterium acnes* in  
815 *acne vulgaris*: The critical importance of skin sampling methodologies. *Clin Dermatol* 35:118-  
816 129.
- 817 91. Lory S. 2014. The Family Staphylococcaceae, p 363-366. *In* Rosenberg E, DeLong EF, Lory S,  
818 Stackebrandt E, Thompson F (ed), *The Prokaryotes: Firmicutes and Tenericutes*. Springer Berlin  
819 Heidelberg, Berlin, Heidelberg.
- 820 92. Xie CH, Yokota A. 2005. Reclassification of *Alcaligenes latus* strains IAM 12599T and IAM 12664  
821 and *Pseudomonas saccharophila* as *Azohydromonas lata* gen. nov., comb. nov., *Azohydromonas*  
822 *australica* sp. nov. and *Pelomonas saccharophila* gen. nov., comb. nov., respectively. *Int J Syst*  
823 *Evol Microbiol* 55:2419-25.
- 824 93. Gomila M, Bowien B, Falsen E, Moore ER, Lalucat J. 2007. Description of *Pelomonas aquatica* sp.  
825 nov. and *Pelomonas puraquae* sp. nov., isolated from industrial and haemodialysis water. *Int J*  
826 *Syst Evol Microbiol* 57:2629-35.
- 827 94. Humphrey B, McLeod N, Turner C, Sutton JM, Dark PM, Warhurst G. 2015. Removal of  
828 Contaminant DNA by Combined UV-EMA Treatment Allows Low Copy Number Detection of  
829 Clinically Relevant Bacteria Using Pan-Bacterial Real-Time PCR. *PLoS ONE* 10:e0132954.

- 830 95. Anchana Devi C, Ranjani A, Dhanasekaran D, Thajuddin N, Ramanidevi T. 2013. Surveillance of  
831 multidrug resistant bacteria pathogens from female infertility cases. *Afr J Biotechnol* 12:4129-  
832 4134.
- 833 96. Spring S, Jäckel U, Wagner M, Kämpfer P. 2004. *Ottowia thiooxydans* gen. nov., sp. nov., a novel  
834 facultatively anaerobic, N<sub>2</sub>O-producing bacterium isolated from activated sludge, and transfer  
835 of *Aquaspirillum gracile* to *Hylemonella gracilis* gen. nov., comb. nov. *Int J Syst Evol Microbiol*  
836 54:99-106.
- 837 97. Felföldi T, Kéki Z, Sipos R, Márialigeti K, Tindall BJ, Schumann P, Tóth EM. 2011. *Ottowia*  
838 *pentelensis* sp. nov., a floc-forming betaproteobacterium isolated from an activated sludge  
839 system treating coke plant effluent. *Int J Syst Evol Microbiol* 61:2146-2150.
- 840 98. Cao J, Lai Q, Liu Y, Li G, Shao Z. 2014. *Ottowia beijingensis* sp. nov., isolated from coking  
841 wastewater activated sludge, and emended description of the genus *Ottowia*. *Int J Syst Evol*  
842 *Microbiol* 64:963-967.
- 843 99. Geng S, Pan X-C, Mei R, Wang Y-N, Sun J-Q, Liu X-Y, Tang Y-Q, Wu X-L. 2014. *Ottowia*  
844 *shaoguanensis* sp. nov., Isolated From Coking Wastewater. *Curr Microbiol* 68:324-329.
- 845 100. Heo J, Cho H, Hong S-B, Kim J-S, Kwon S-W, Kim S-J. 2018. *Ottowia oryzae* sp. nov., isolated from  
846 Andong sikhye, a Korean traditional rice beverage. *Int J Syst Evol Microbiol* 68:3096-3100.
- 847 101. Yi KJ, Im W-T, Kim D-W, Kim S-K. 2018. *Ottowia konkukae* sp. nov., isolated from rotten biji (tofu  
848 residue). *Int J Syst Evol Microbiol* 68:3458-3462.
- 849 102. Shi S-B, Li G-D, Yang L-F, Liu C, Jiang M-G, Li Q-Y, Wu J-F, Zhang K, Jiang L-Q, Shen N-K, Jiang C-L,  
850 Jiang Y. 2019. *Ottowia flava* sp. nov., isolated from fish intestines. *Antonie van Leeuwenhoek*  
851 112:1567-1575.
- 852 103. Altschul SF, Gish W, Miller W, Myers EW, Lipman DJ. 1990. Basic local alignment search tool. *J*  
853 *Mol Biol* 215:403-10.
- 854 104. Dickson RP, Erb-Downward JR, Freeman CM, Walker N, Scales BS, Beck JM, Martinez FJ, Curtis JL,  
855 Lama VN, Huffnagle GB. 2014. Changes in the lung microbiome following lung transplantation  
856 include the emergence of two distinct *Pseudomonas* species with distinct clinical associations.  
857 *PLoS One* 9:e97214-e97214.
- 858 105. Callahan BJ, McMurdie PJ, Rosen MJ, Han AW, Johnson AJA, Holmes SP. 2016. DADA2: High-  
859 resolution sample inference from Illumina amplicon data. *Nat Methods* 13:581-583.
- 860 106. Davis NM, Proctor DM, Holmes SP, Relman DA, Callahan BJ. 2018. Simple statistical  
861 identification and removal of contaminant sequences in marker-gene and metagenomics data.  
862 *Microbiome* 6:226-226.
- 863 107. Hammer O, Harper D, Ryan P. 2001. PAST: Paleontological Statistics software package for  
864 education and data analysis. *Palaeontologia Electronica* 4:1-9.

865

866



867 **FIGURES**

868 **Figure 1. Results of bacterial culture of ESwabs of rhesus macaque fetal and placental**  
869 **tissues.** ESwabs of the proximal colon, distal colon, chorionic plate (both amnion-chorion  
870 interface and the subchorion), and the villous tree were collected from each of the four subjects  
871 and plated on chocolate and blood agar, which was then incubated under anaerobic and aerobic  
872 conditions for seven days. SP4 broth was also inoculated to assess the presence of genital  
873 ureaplasmas.

874 **Figure 2. Quantitative real-time PCR (qPCR) analyses illustrating the cycle of**  
875 **quantification values among rhesus macaque fetal, placental, and uterine wall A) swab and**  
876 **B) tissue samples, and their respective negative technical controls.** The negative controls for  
877 swab and tissue samples were DNA extraction kits processed with and without a sterile Dacron  
878 swab, respectively. The positive controls are human urine samples. In the plots, lower cycle of  
879 quantification values indicate higher bacterial loads. Bars indicate the median and quartile cycle  
880 of quantification values for each sample and control type. Points, color-coded by sample type,  
881 indicate the mean values of three replicate qPCR reactions. An asterisk indicates that bacterial  
882 loads of that swab or tissue sample type were greater than those of corresponding negative  
883 technical controls based on Mann-Whitney U or t-tests with sequential Bonferroni corrections  
884 applied.

885 **Figure 3. Principal Coordinates Analyses (PCoA) illustrating variation in 16S rRNA gene**  
886 **profiles among fetal, placental, and uterine wall A) swab and B) tissue samples, and their**  
887 **respective negative technical controls.** 16S rRNA gene profiles were characterized using the  
888 Bray-Curtis similarity index.

889 **Figure 4. Heat map illustrating the relative abundances of prominent ( $\geq 5\%$  average**  
890 **relative abundance) amplicon sequence variants (ASVs) among the 16S rRNA gene profiles**  
891 **of fetal, placental, and uterine wall A) swab and B) tissue samples, and their respective**  
892 **negative technical controls.** Human urine samples are included as positive technical controls in  
893 panel A. The four ASVs in red font were identified as background DNA contaminants by the R  
894 package decontam.  
895

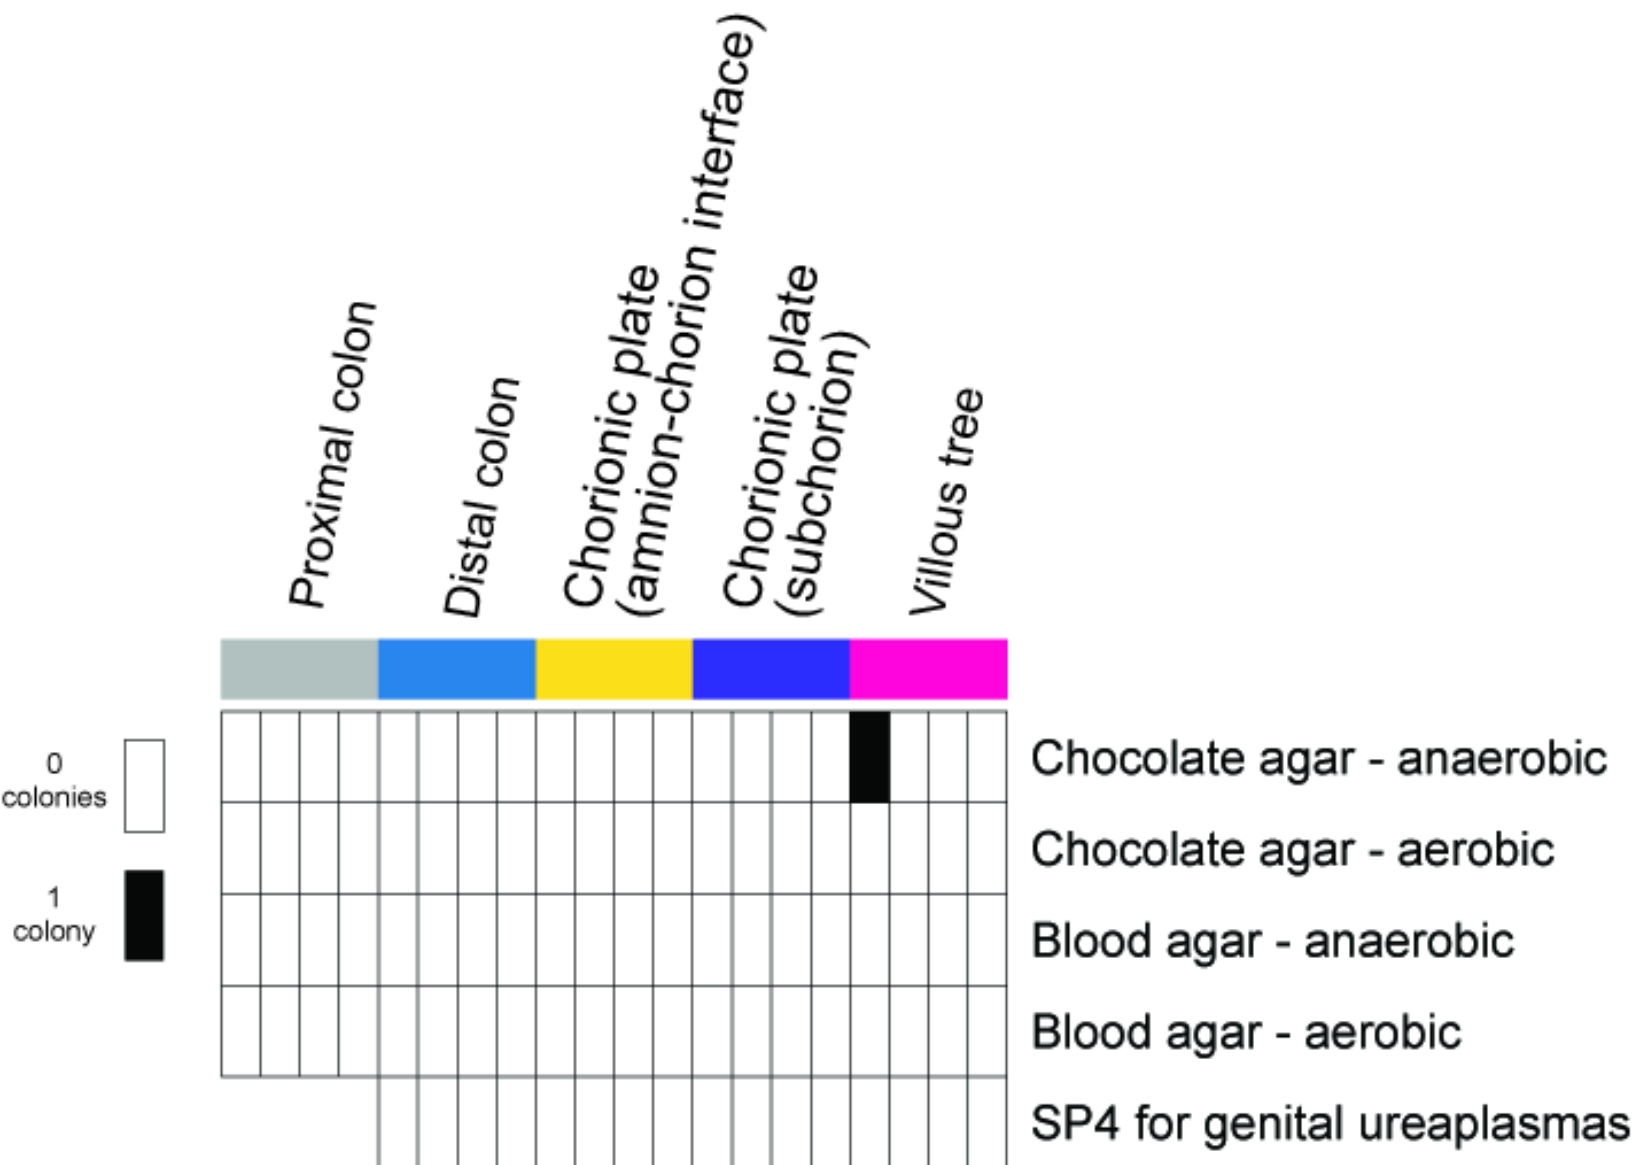

**A.**

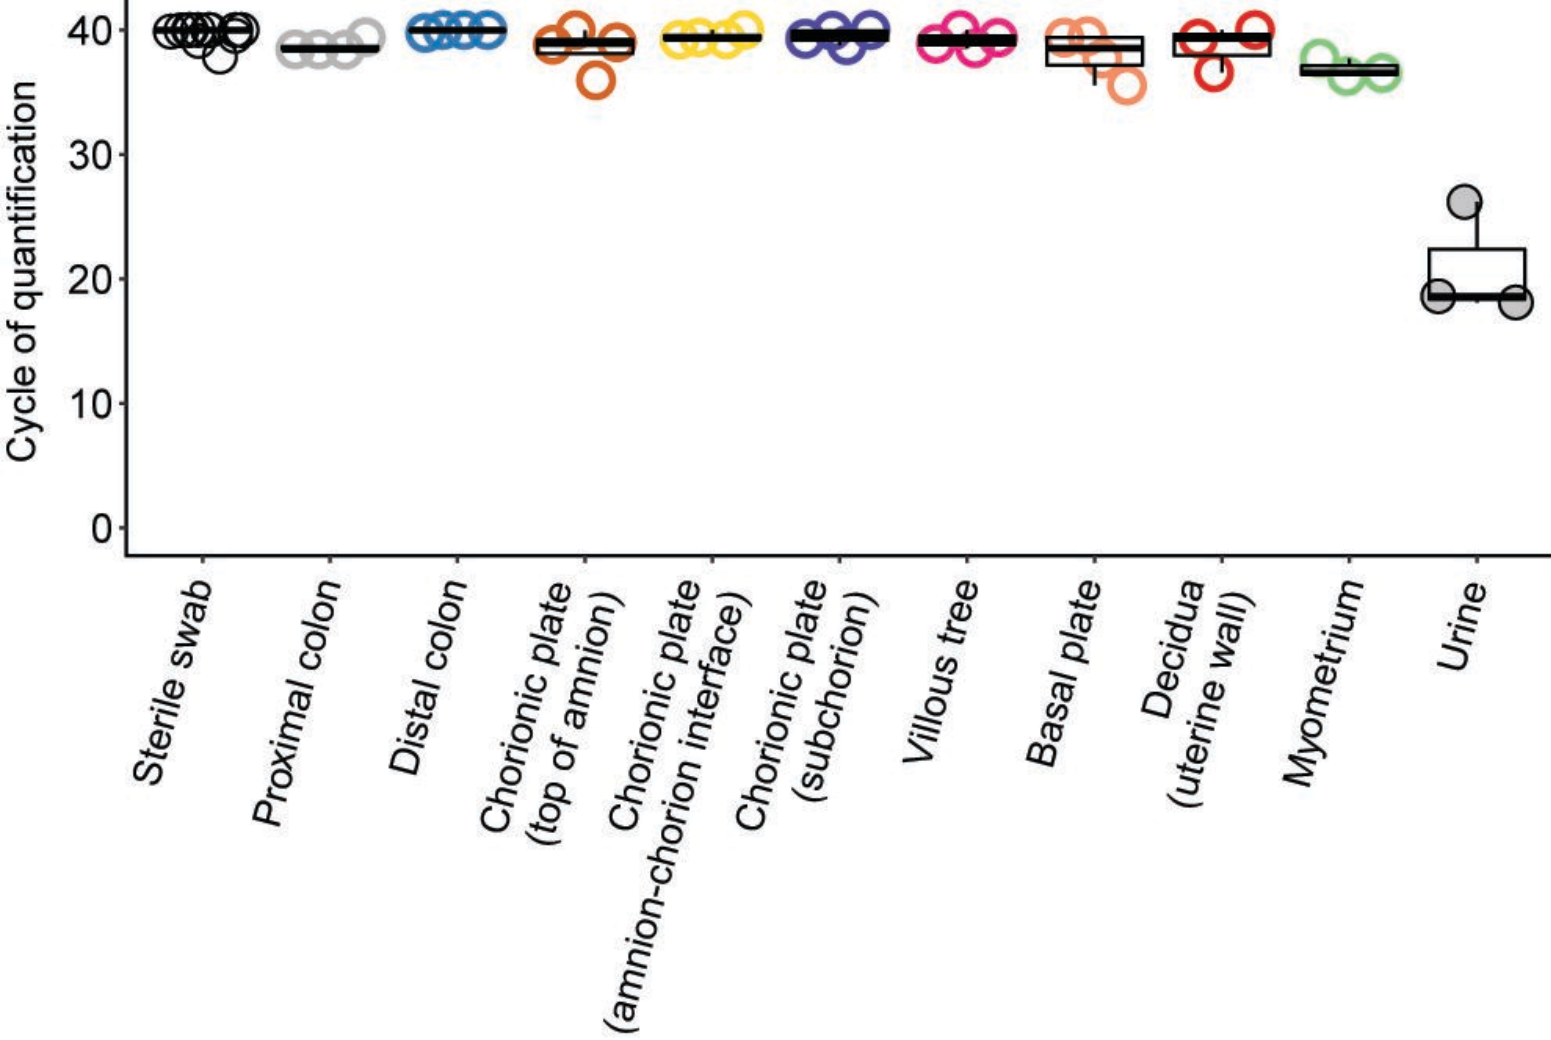

**B.**

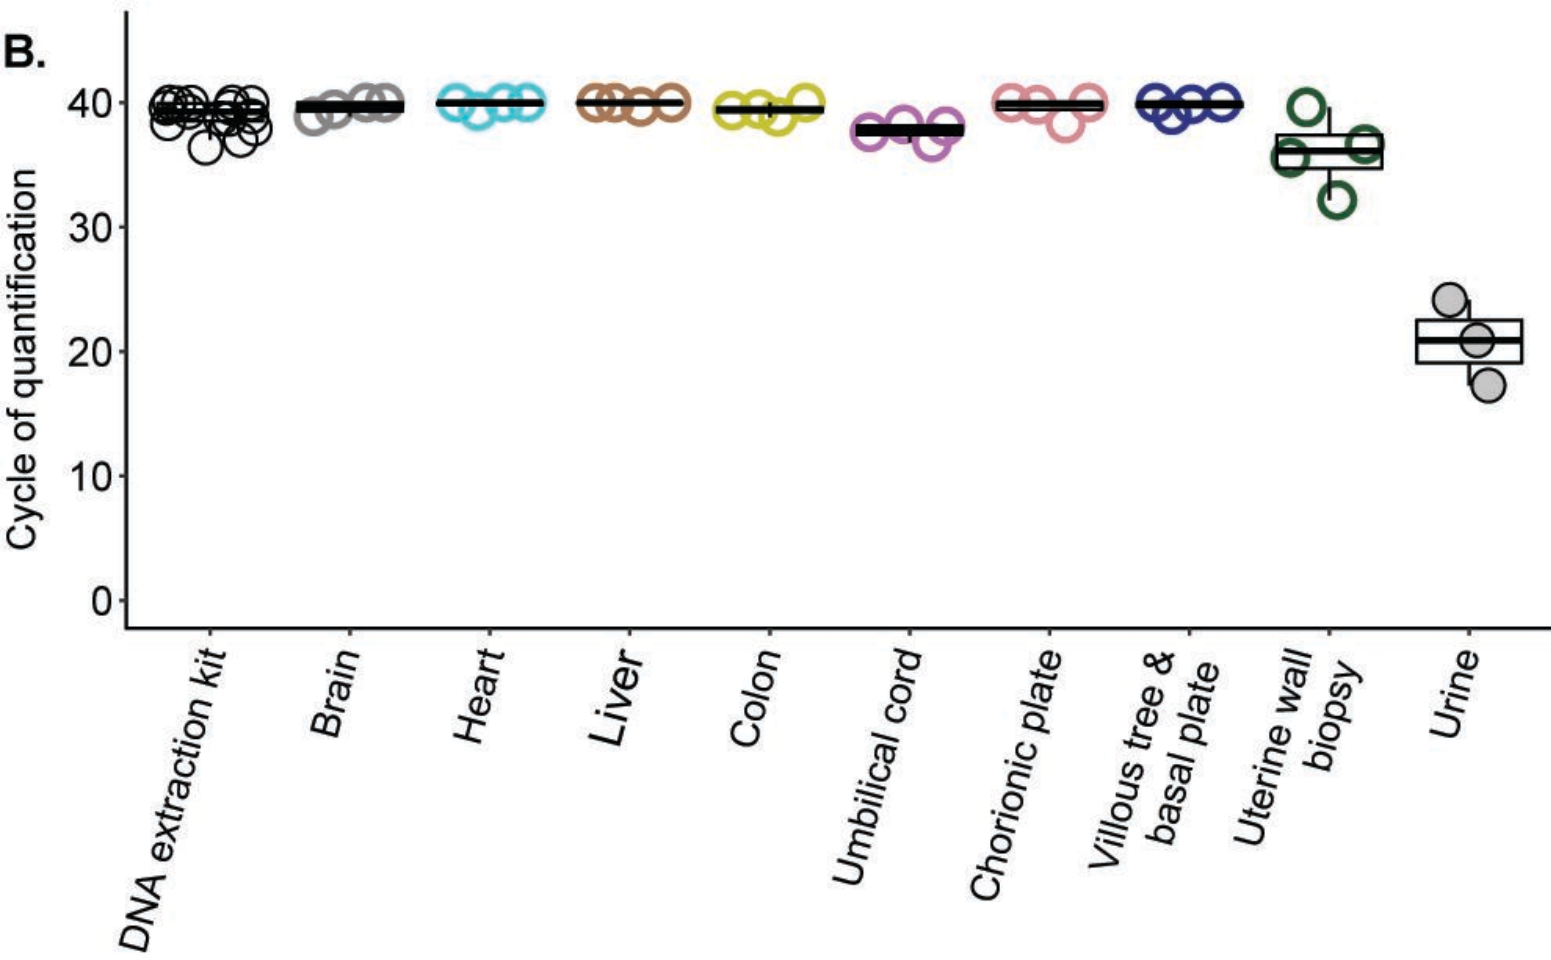

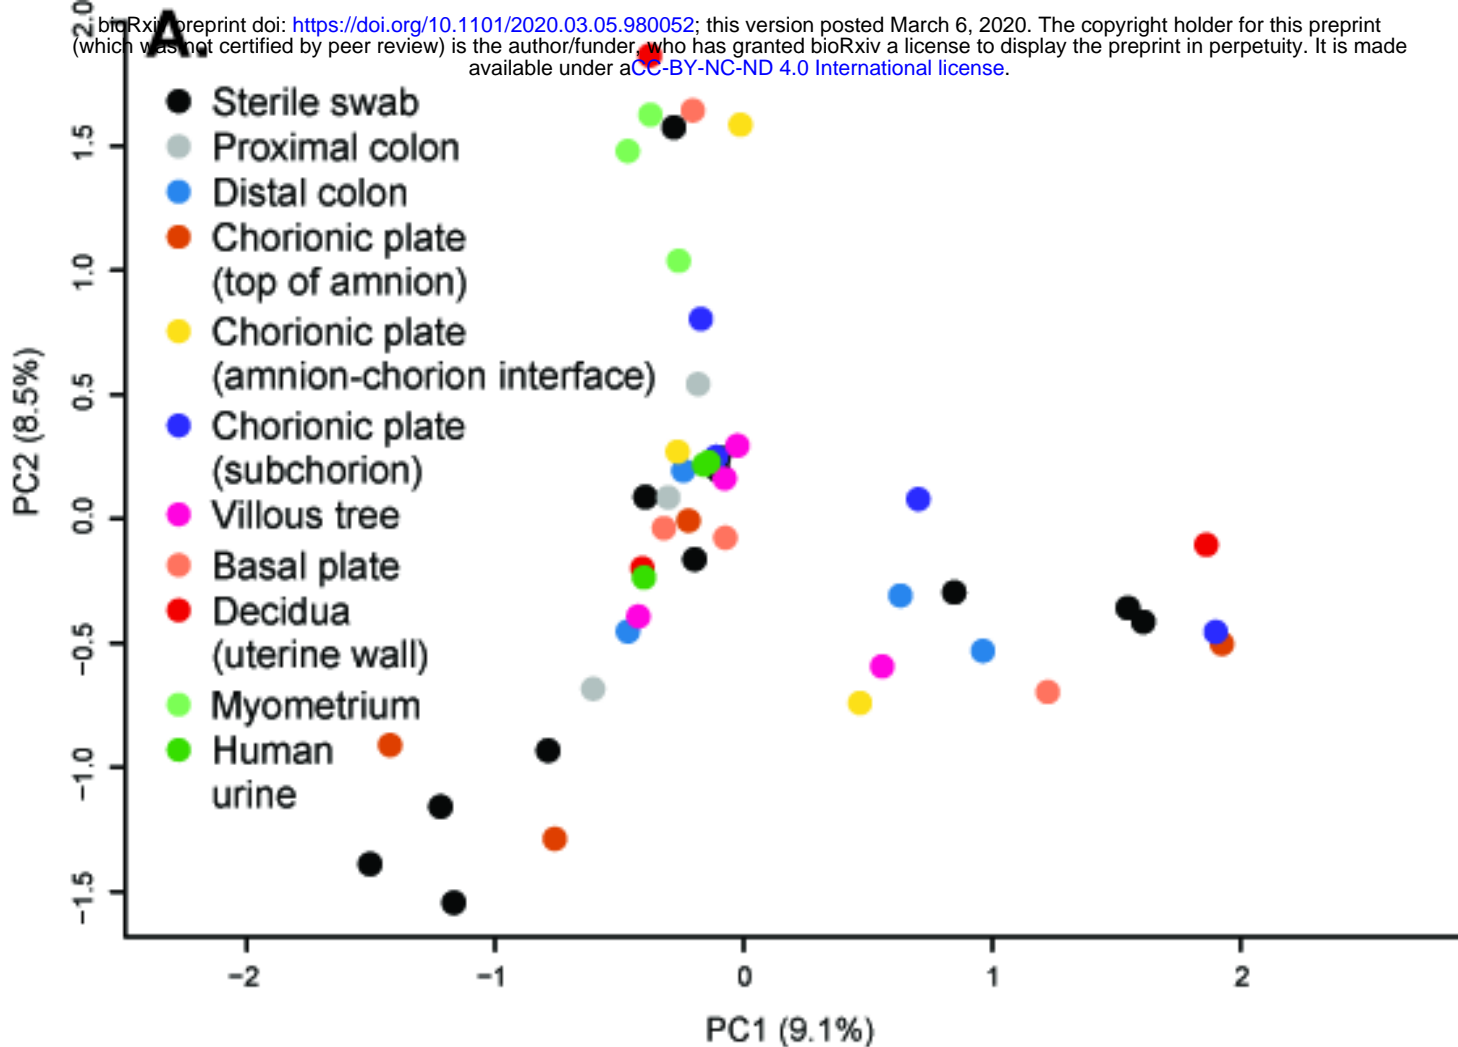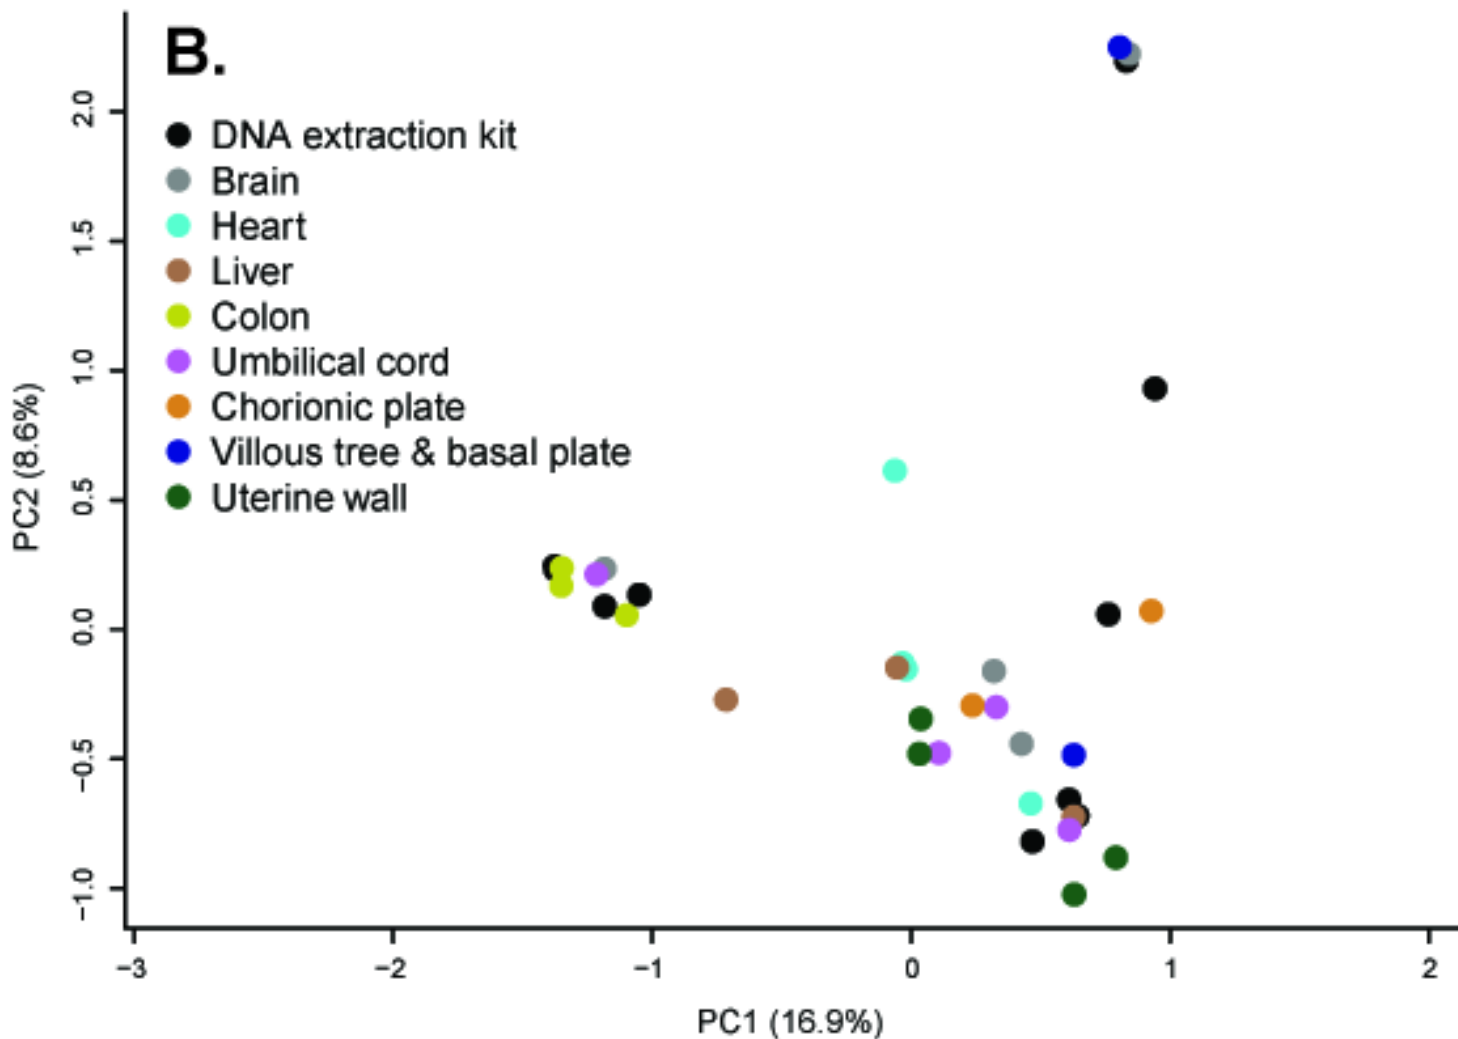

**A.**

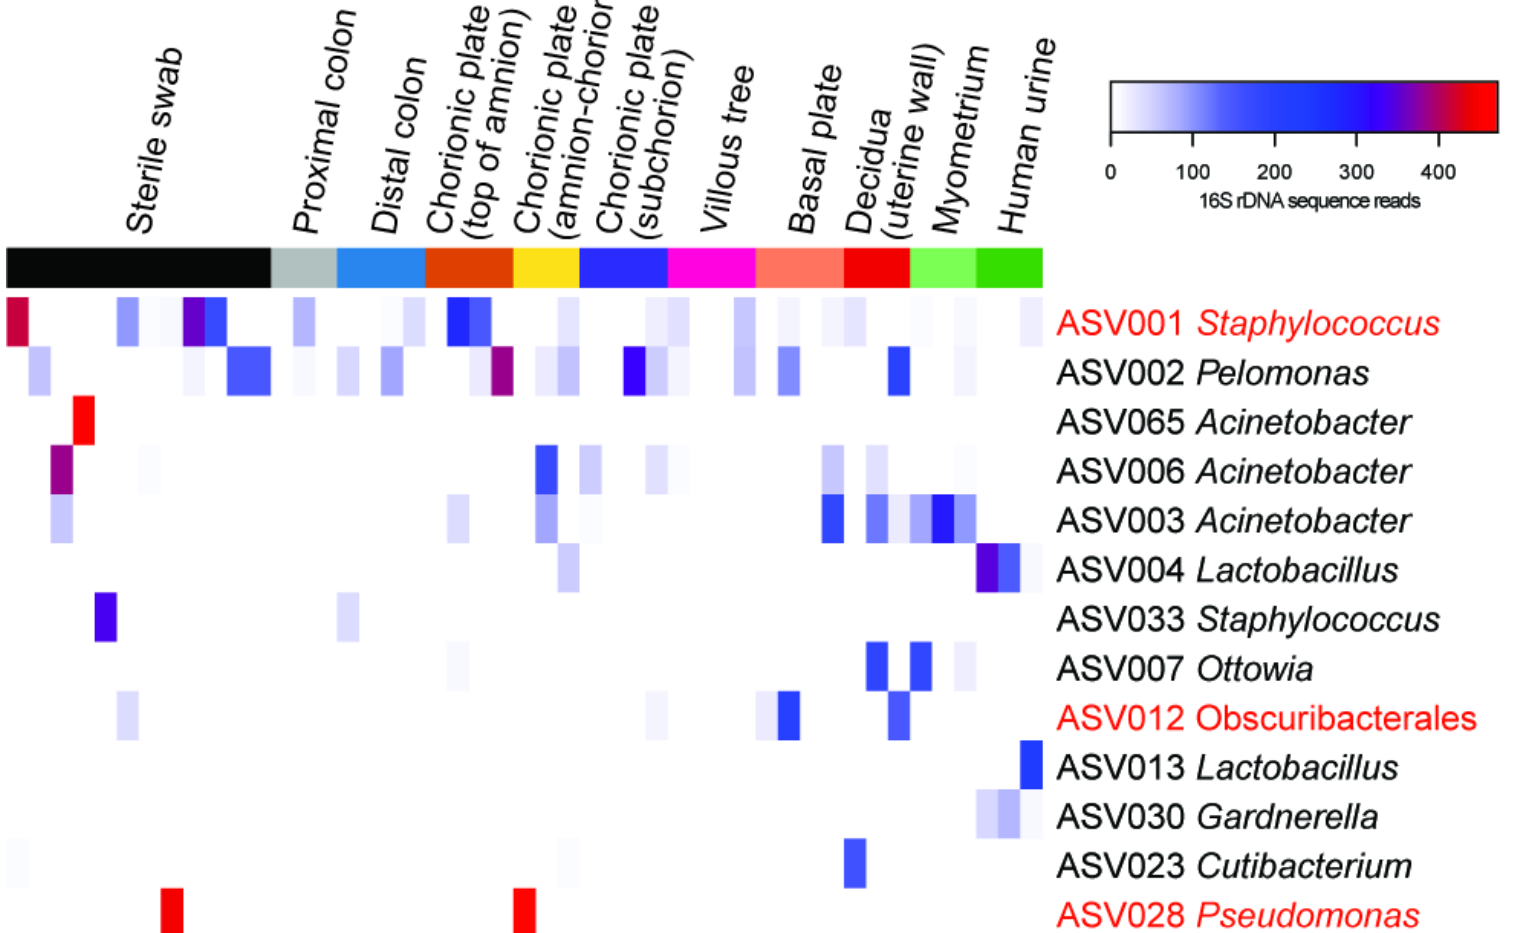

**B.**

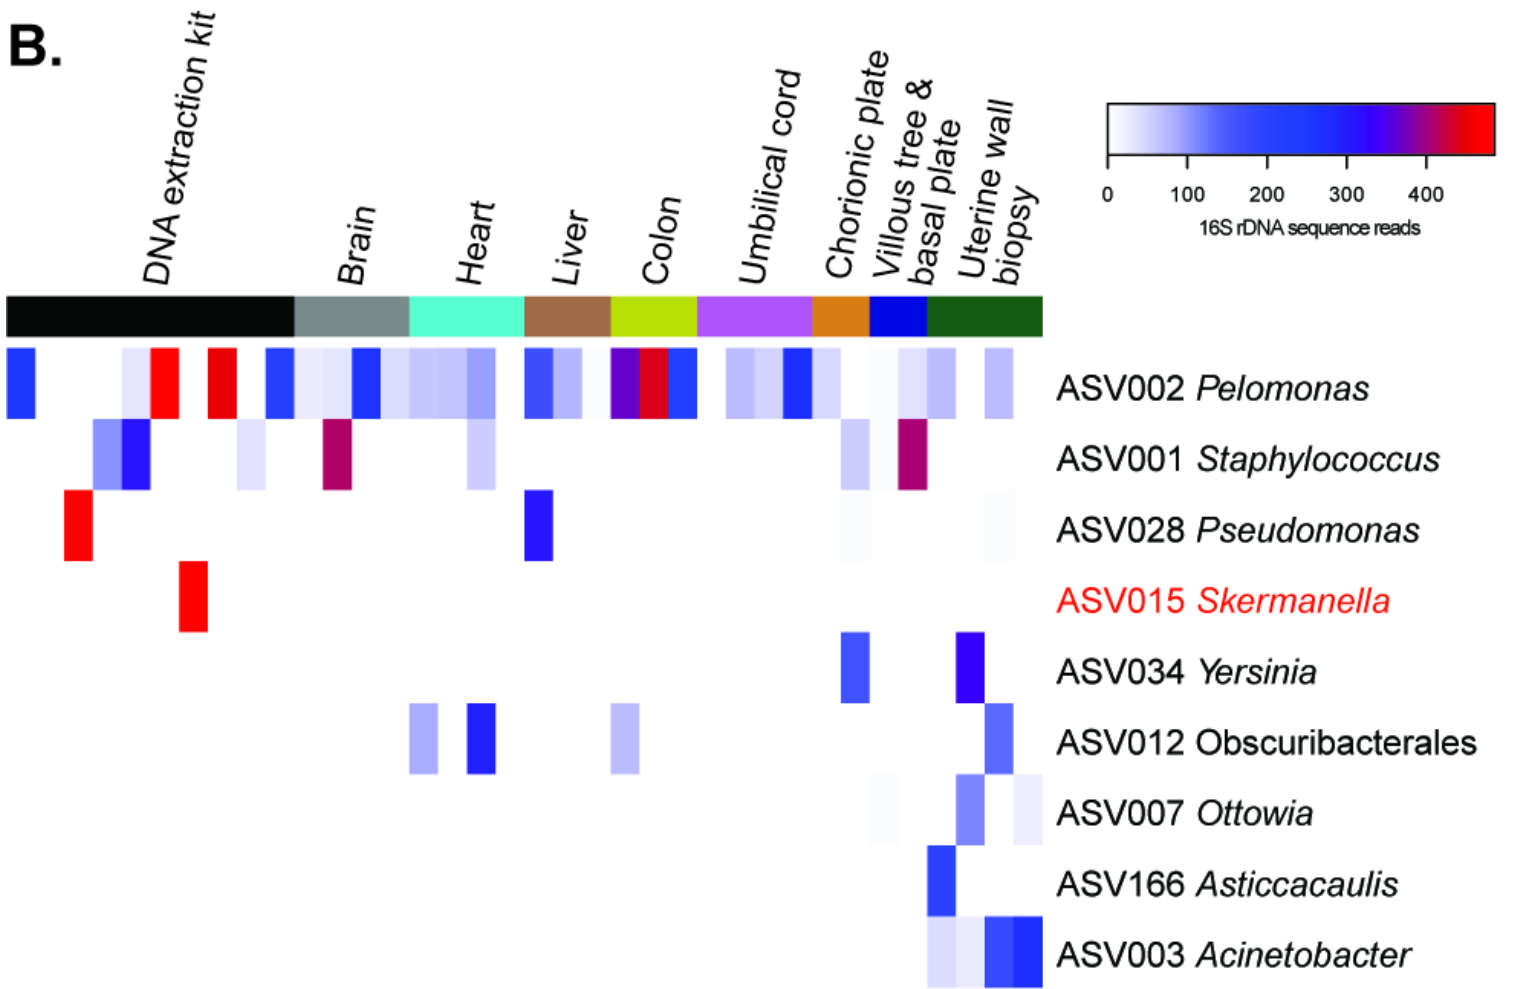

Source: https://www.biorxiv.org/content/10.1101/2020.03.05.980052v1.full.pdf
